# Supplementary material for: Digalloyl Glycoside: A Potential Inhibitor of Trypanosomal PFK from Euphorbia abyssinica J.F. Gmel
Source: MDPI journal article supplement (doi:10.3390/plants11020173), 2022-01-10
Supplement: s1 [file s1]

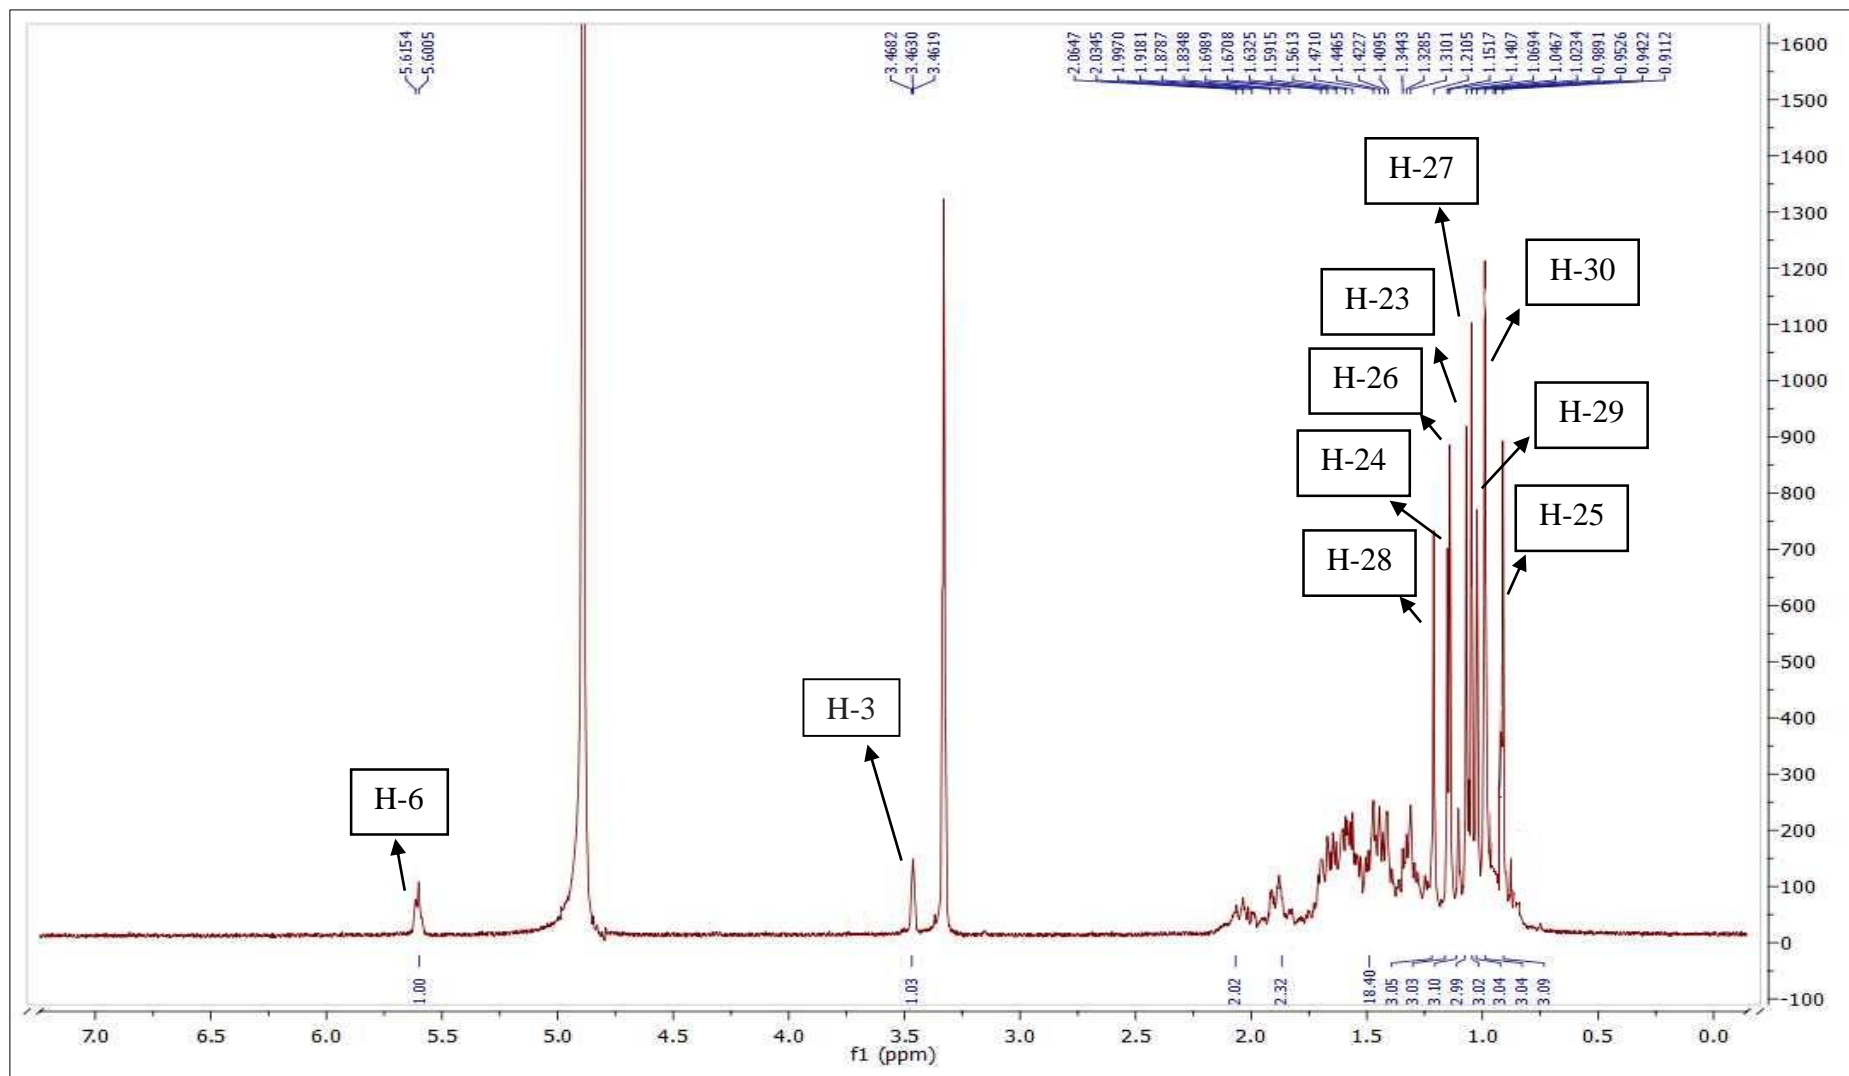

**Figure S1.** <sup>1</sup>H-NMR (400 MHz, CD<sub>3</sub>OD δ ppm) spectrum of compound **1**.

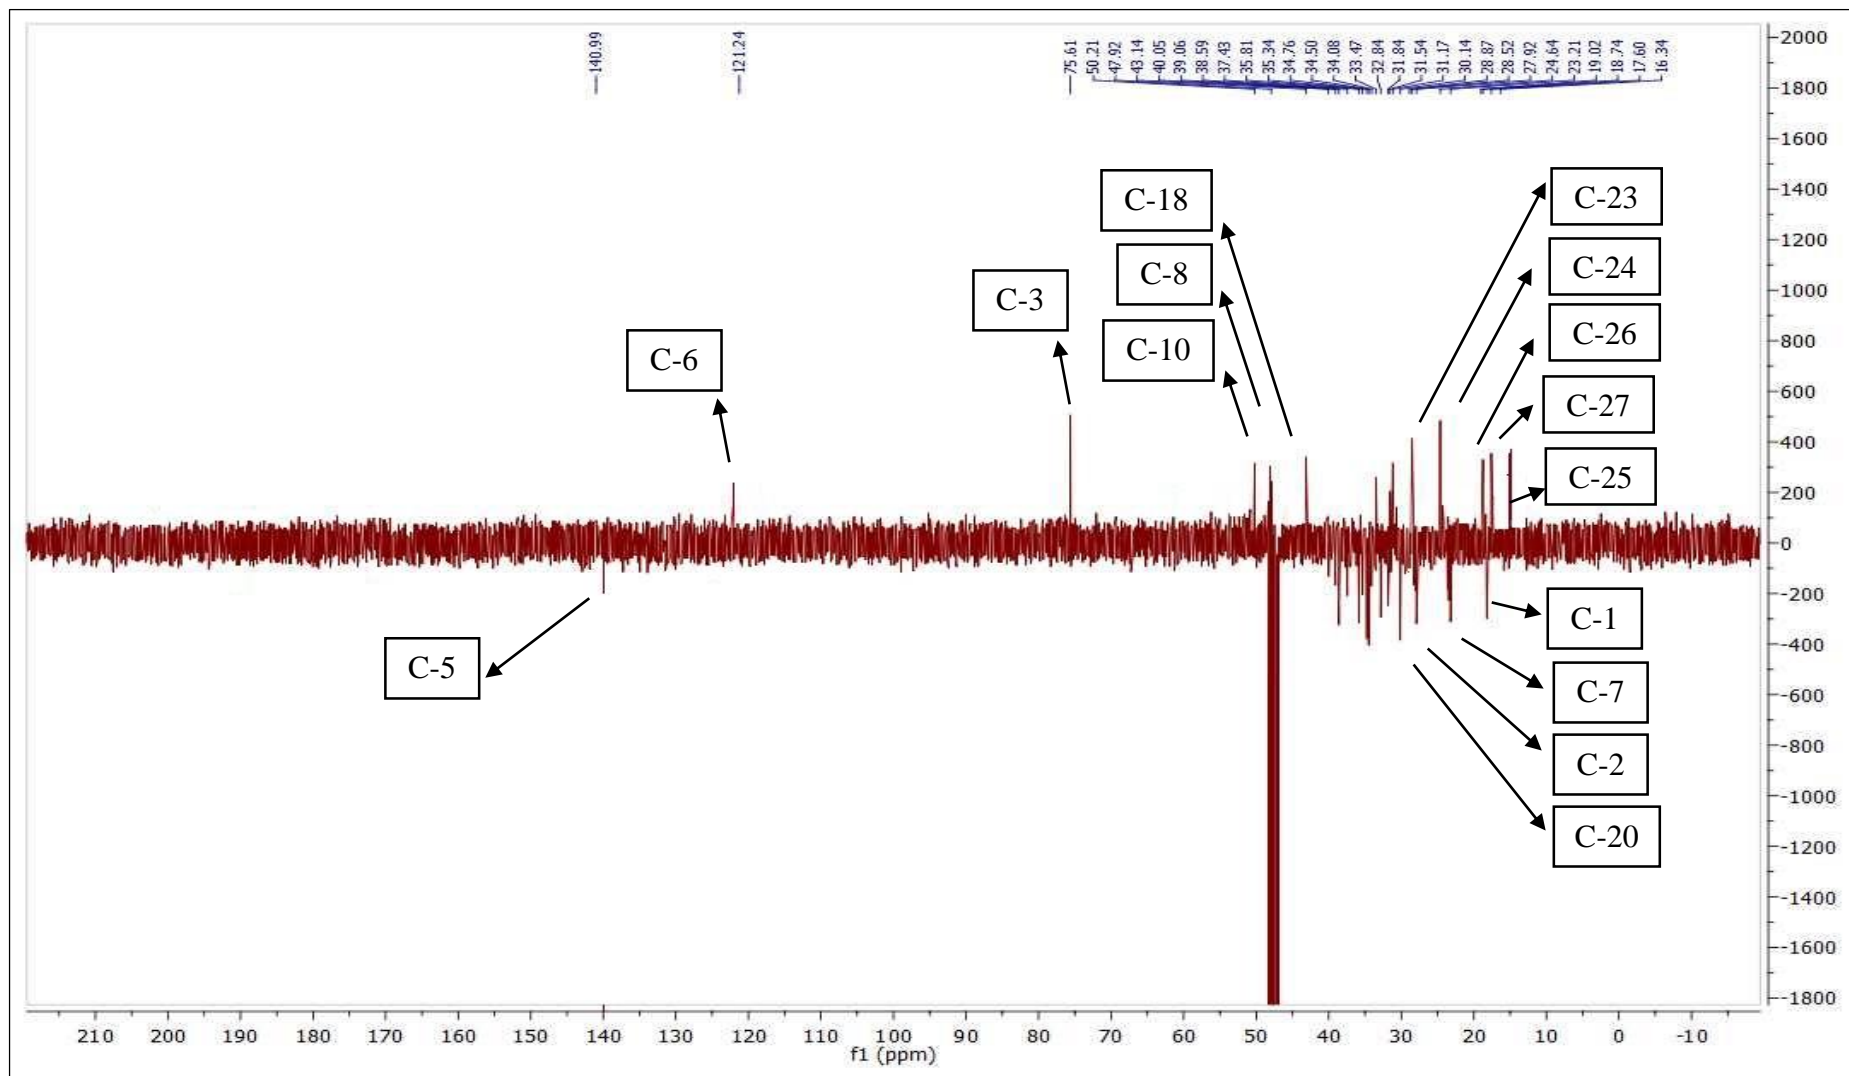

**Figure S2.** DEPT-Q NMR (100 MHz, CD<sub>3</sub>OD  $\delta$  ppm) spectrum of compound **1**.

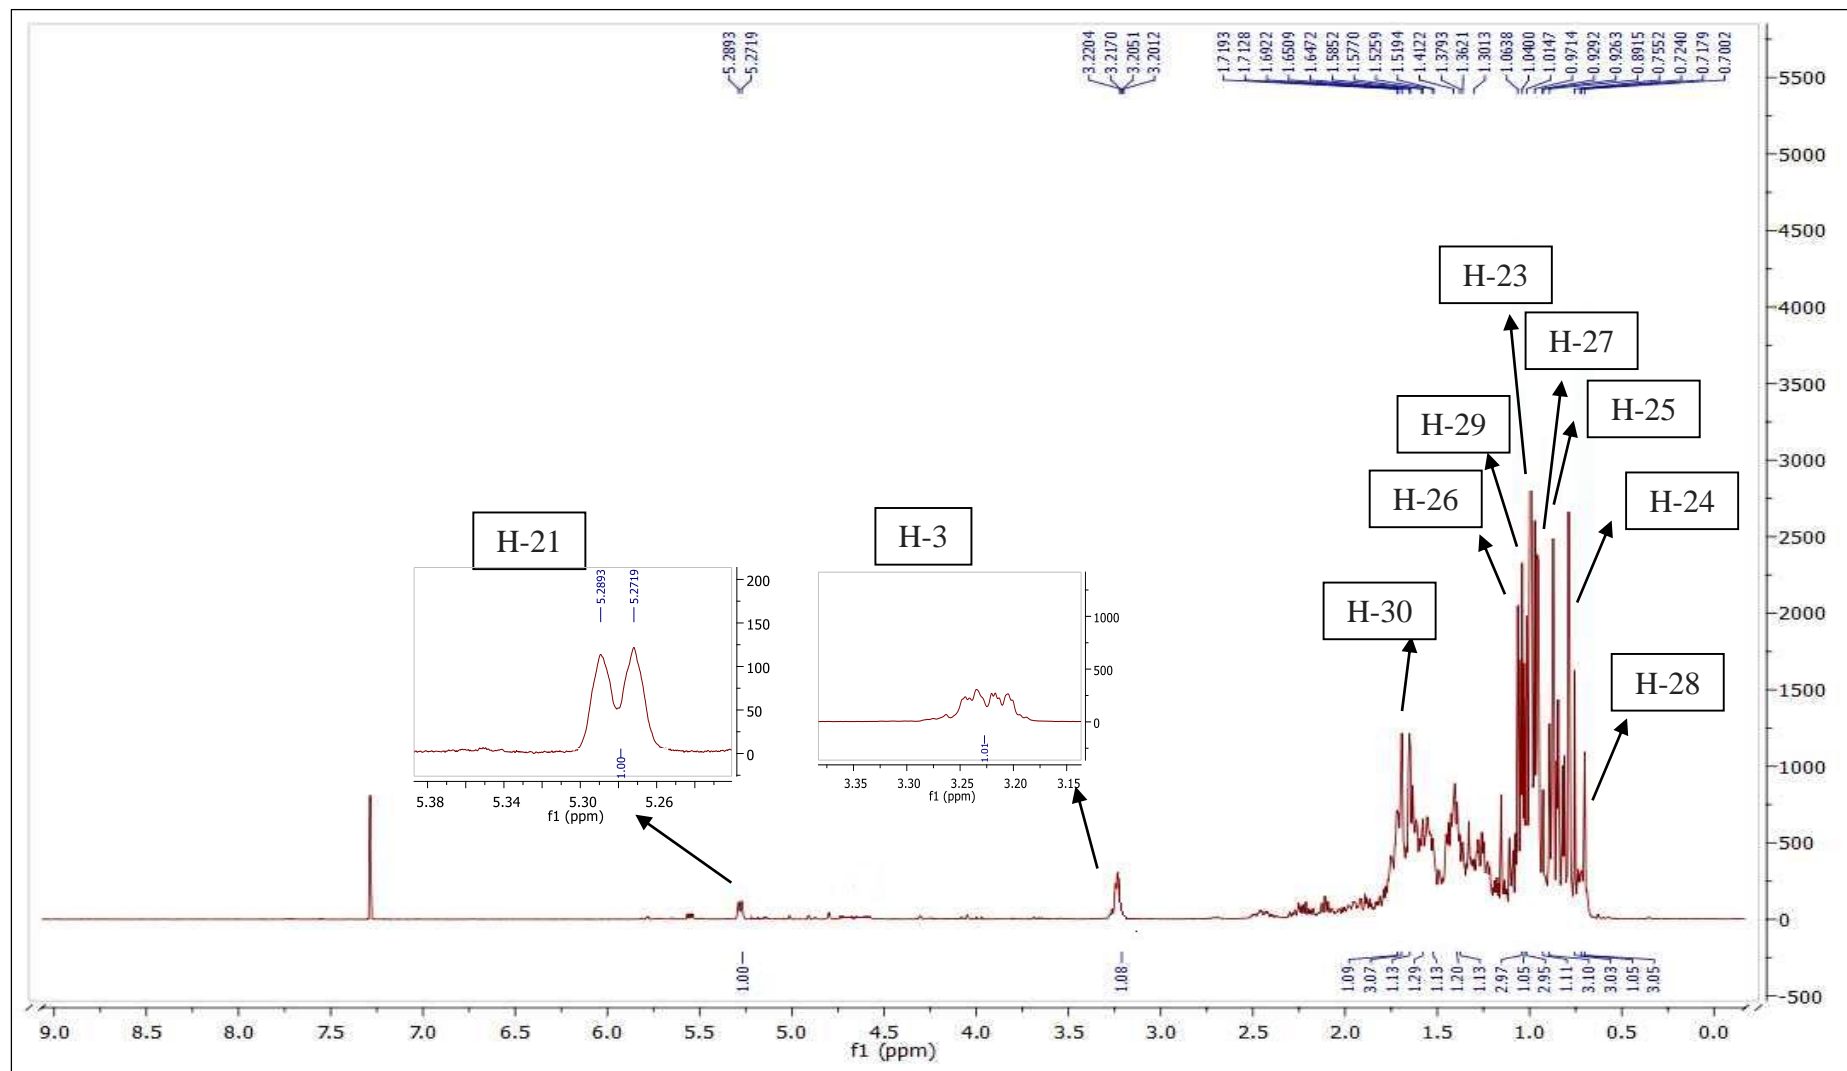

**Figure S3.**  $^1\text{H}$ -NMR (400 MHz,  $\text{CDCl}_3$   $\delta$  ppm) spectrum of compound 2.

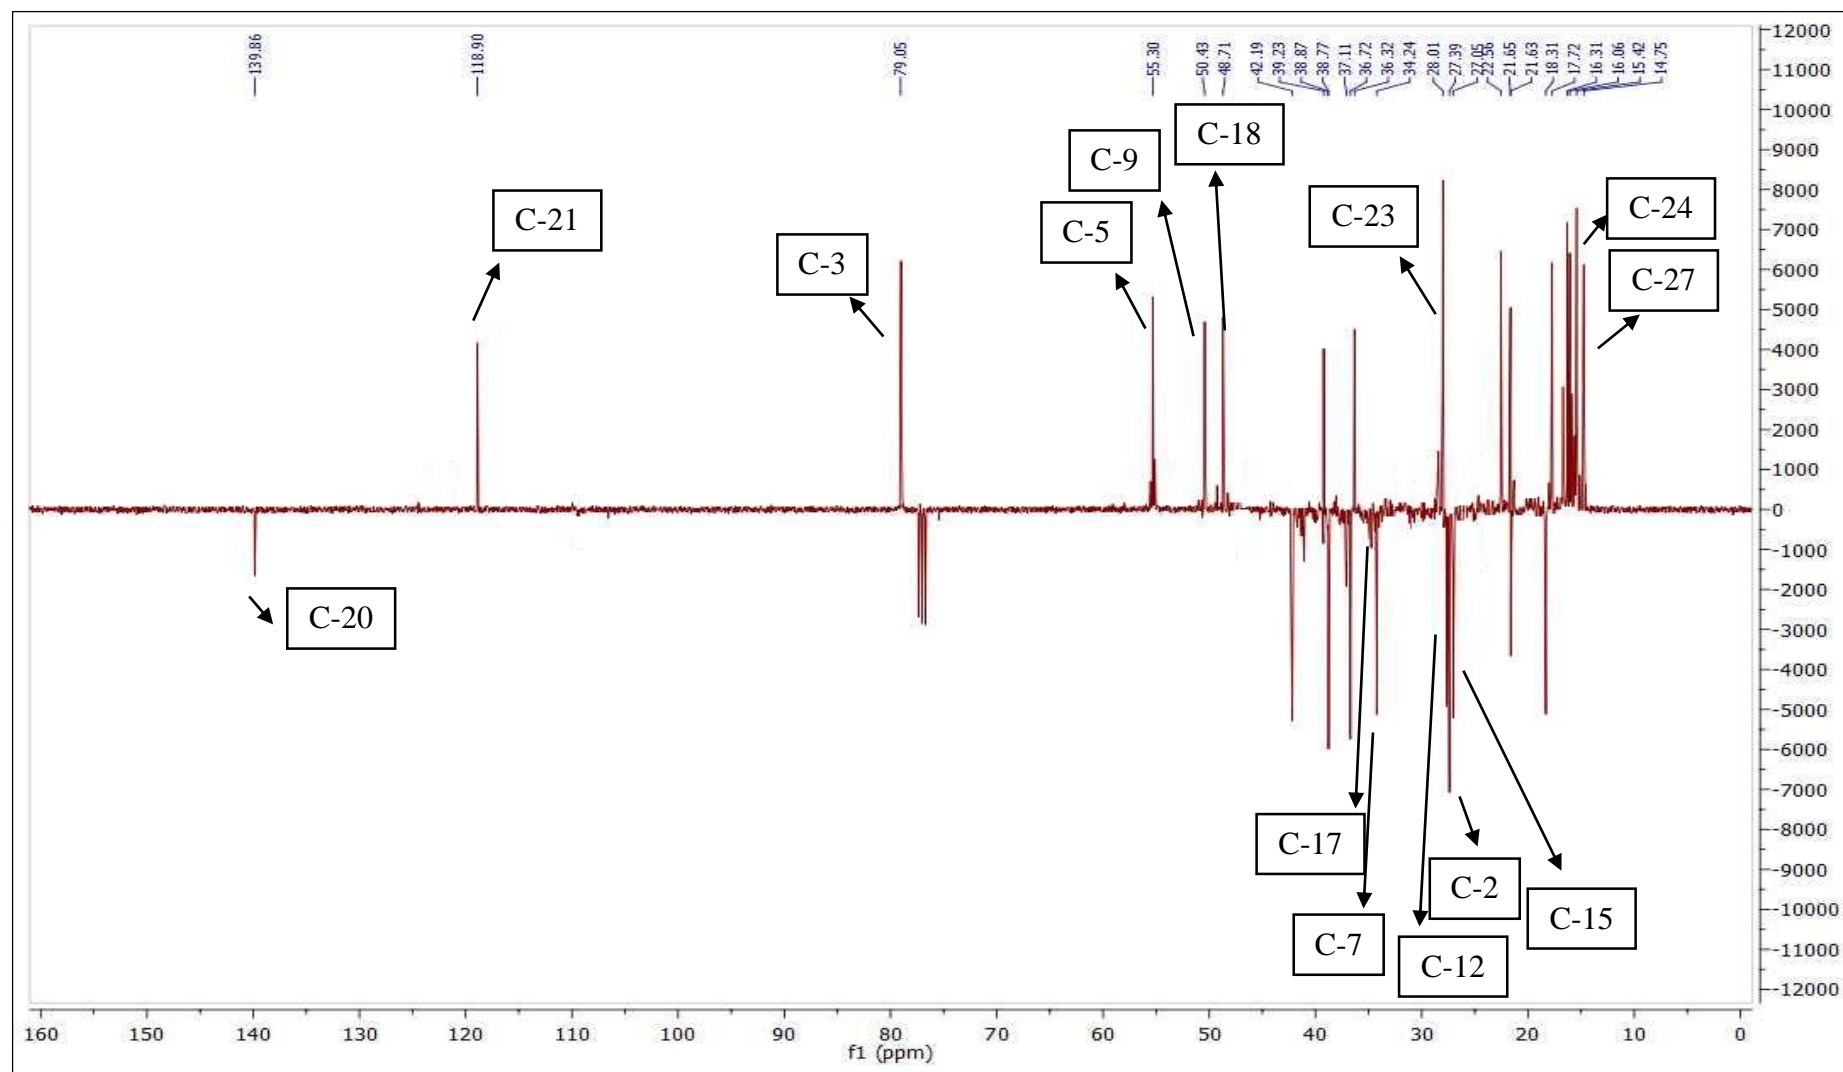

**Figure S4.** DEPT-Q NMR (100 MHz, CDCl<sub>3</sub>  $\delta$  ppm) spectrum of compound 2.

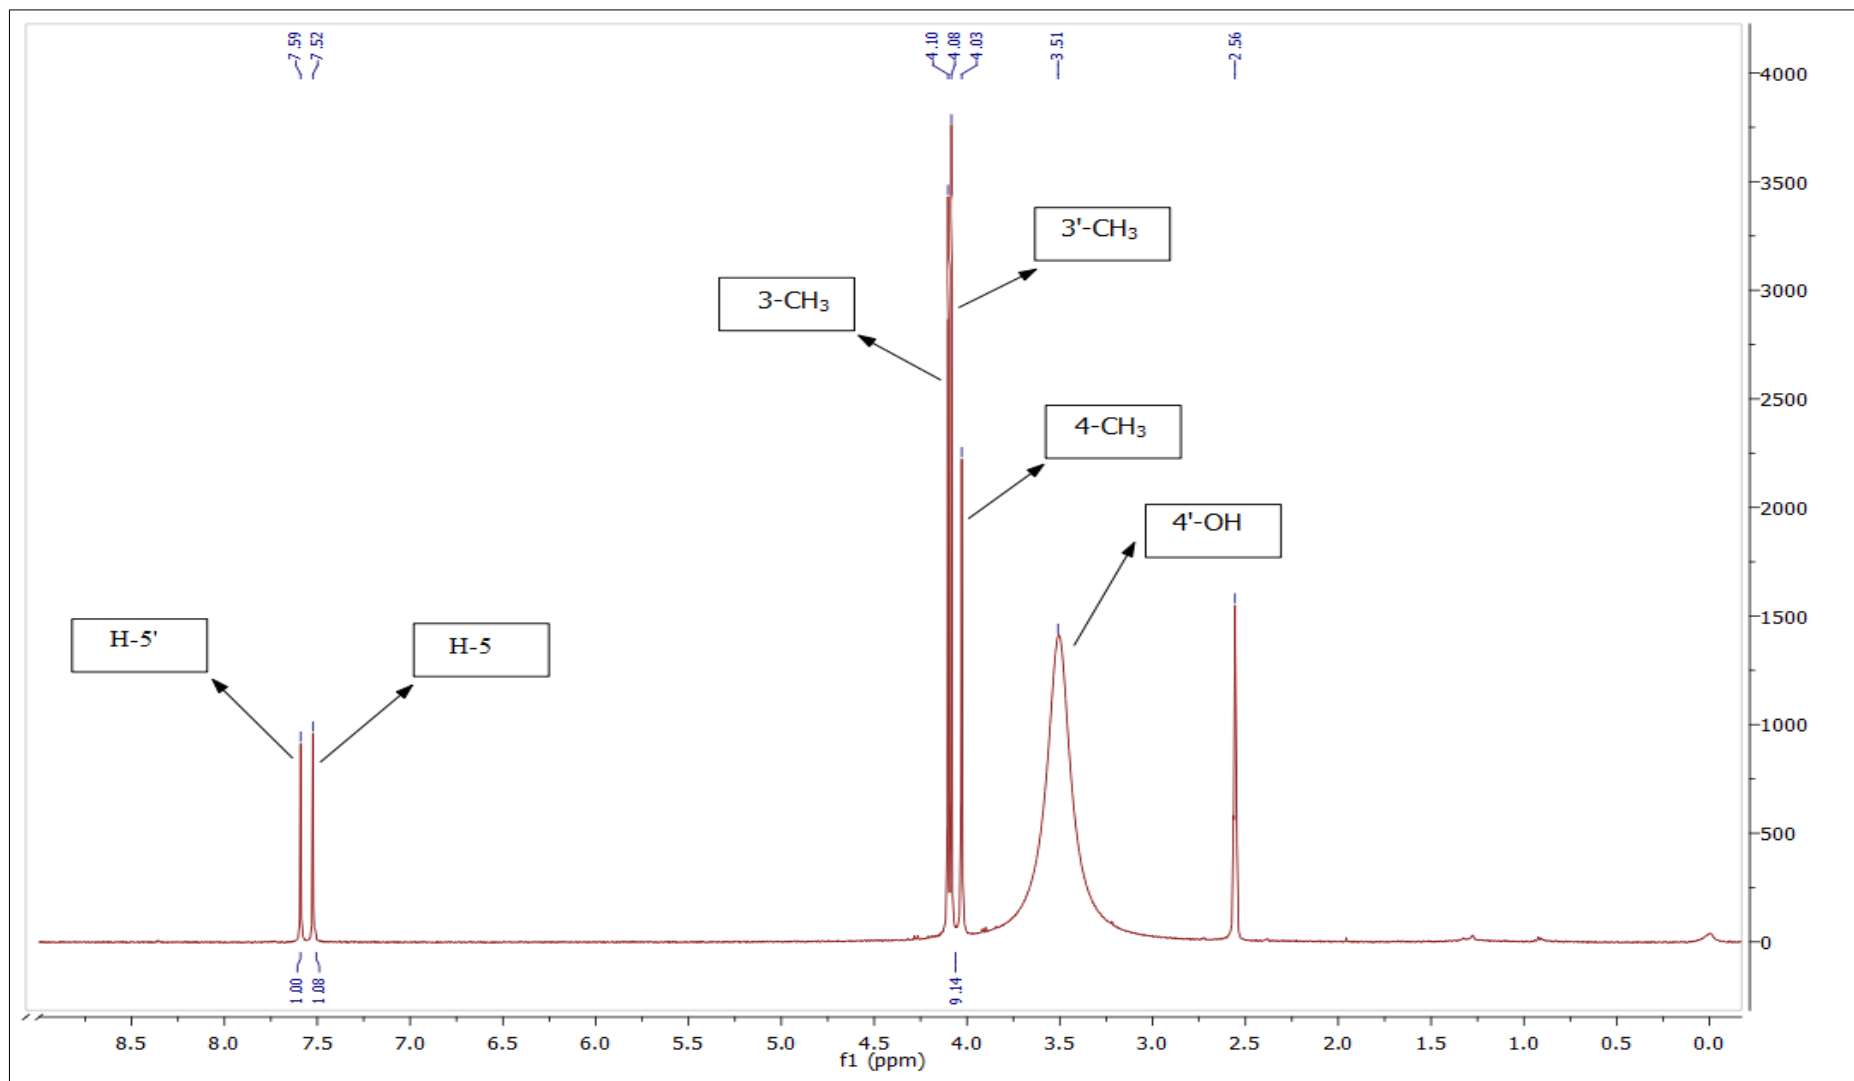

**Figure S5.**  $^1\text{H}$ -NMR (400 MHz,  $\text{DMSO}-d_6$   $\delta$  ppm) spectrum of compound **3**.

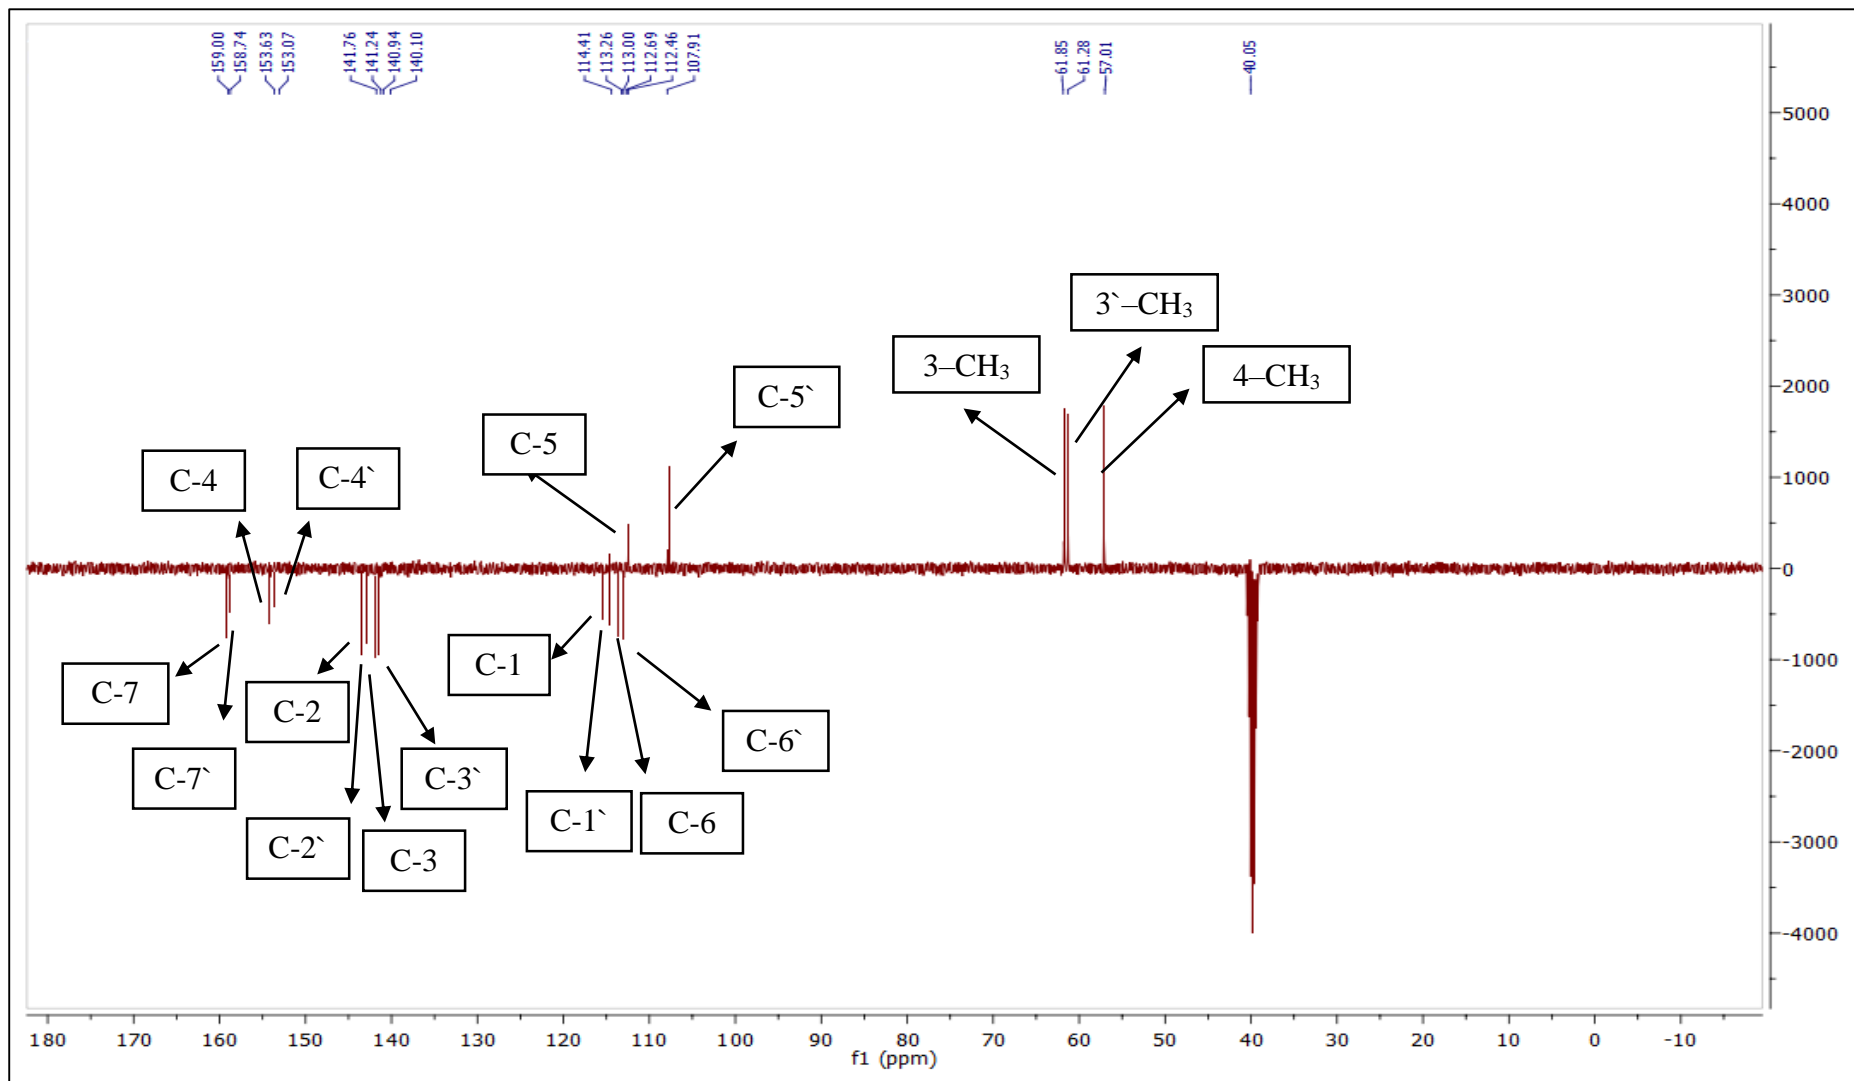

**Figure S6.** DEPT-Q NMR (100 MHz, DMSO- $d_6$   $\delta$  ppm) spectrum of compound **3**.

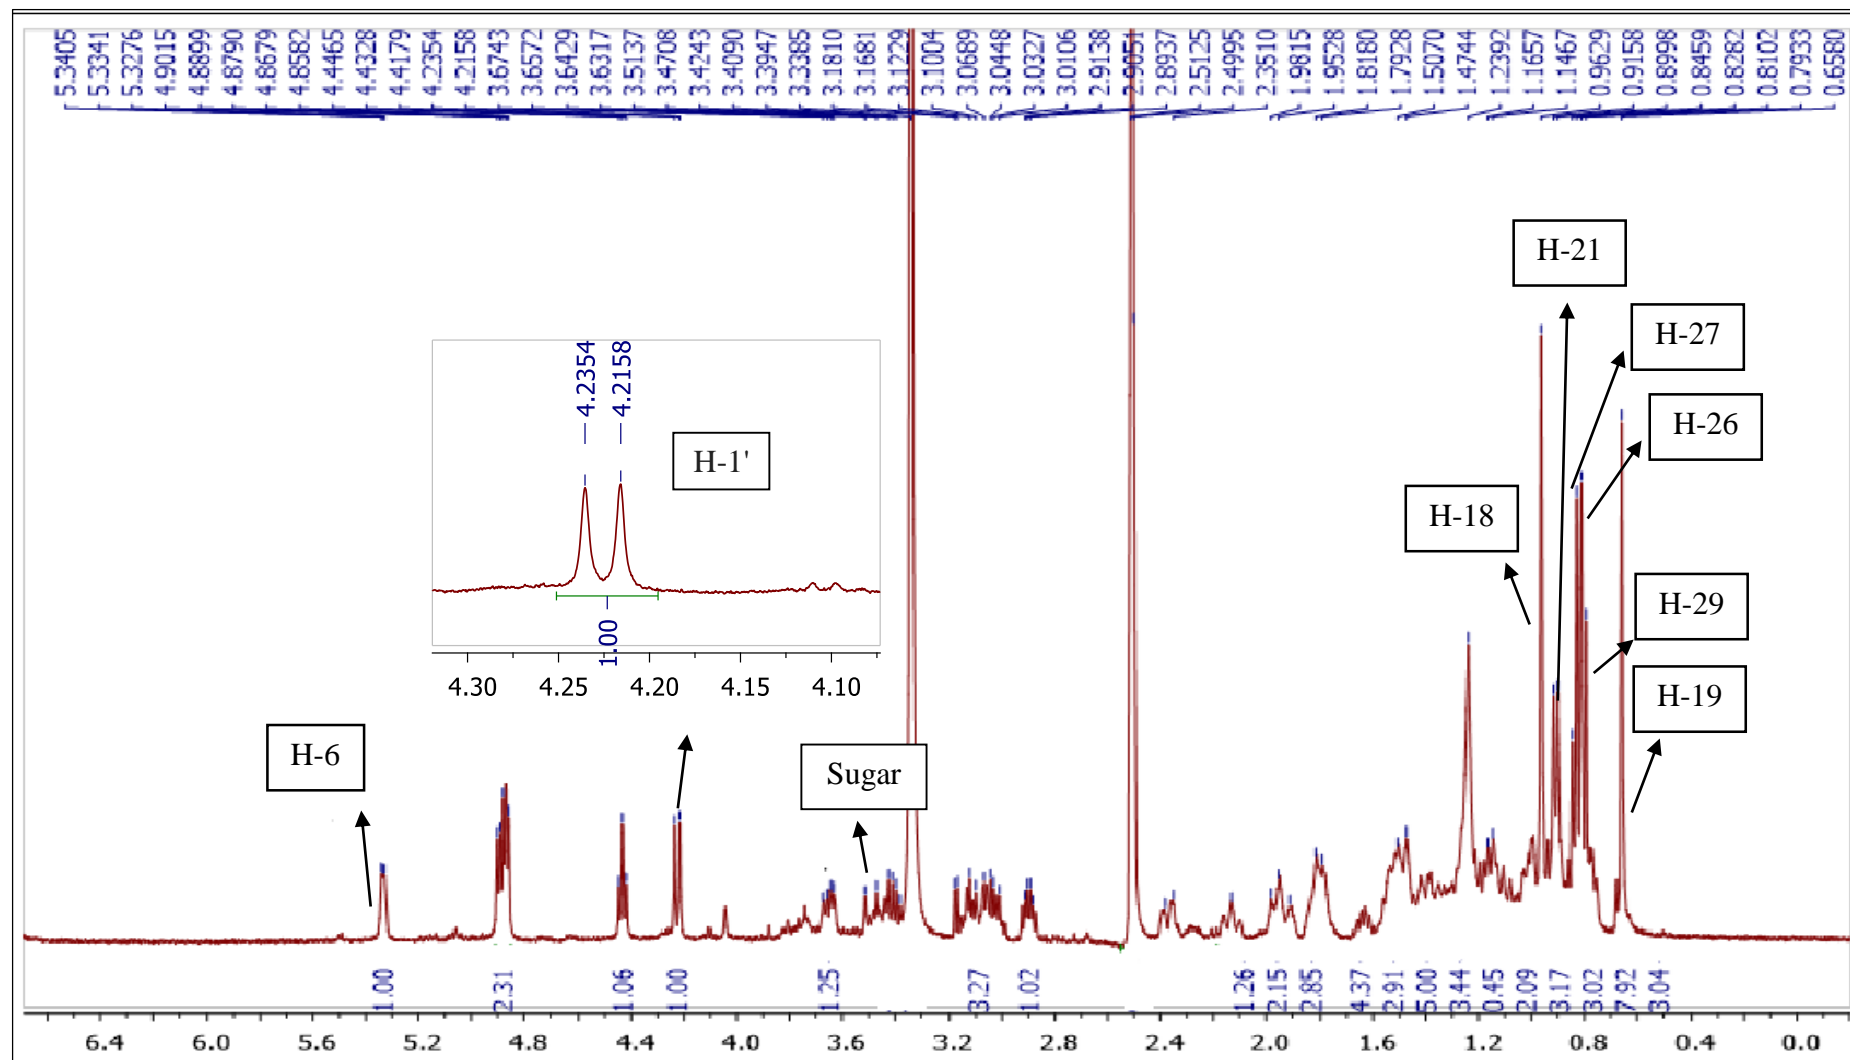

**Figure S7.**  $^1\text{H}$ -NMR (400 MHz,  $\text{DMSO}-d_6$   $\delta$  ppm) spectrum of compound **4**.

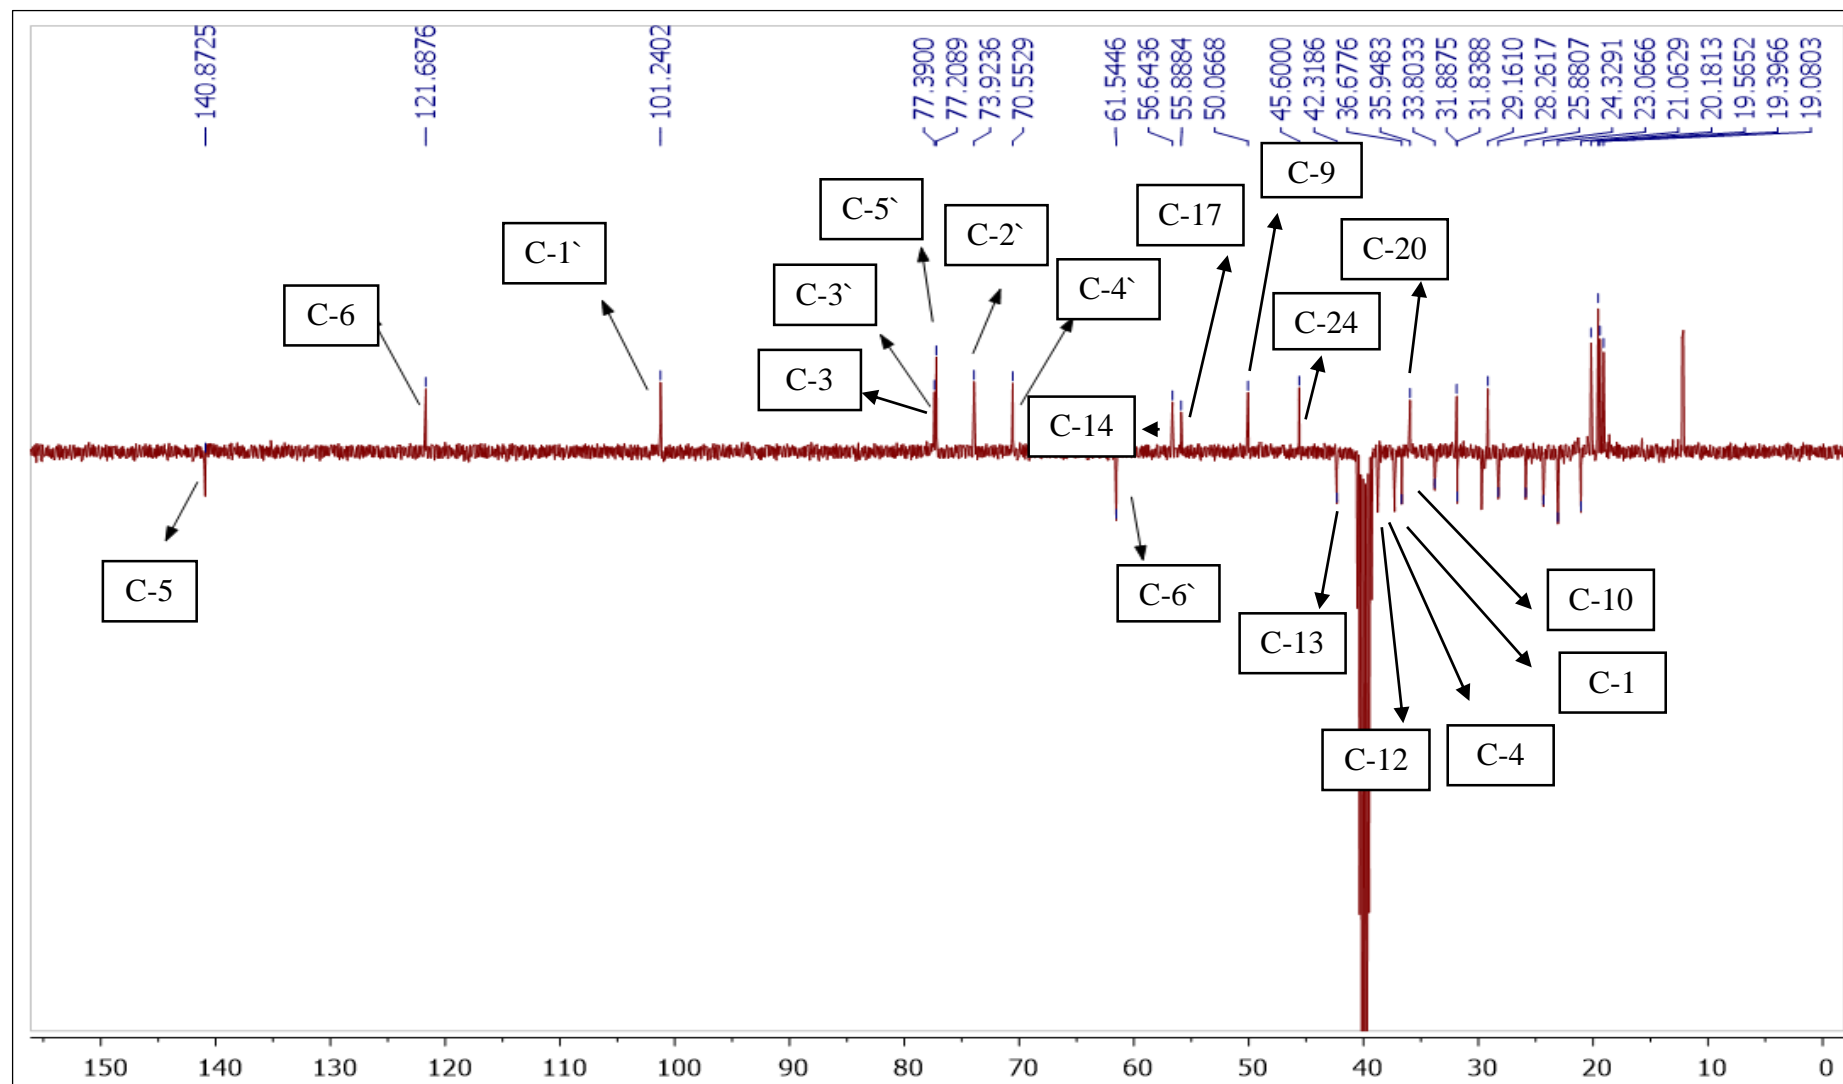

**Figure S8.** DEPT-Q NMR (100 MHz, DMSO-*d*<sub>6</sub> δ ppm) spectrum of compound 4.



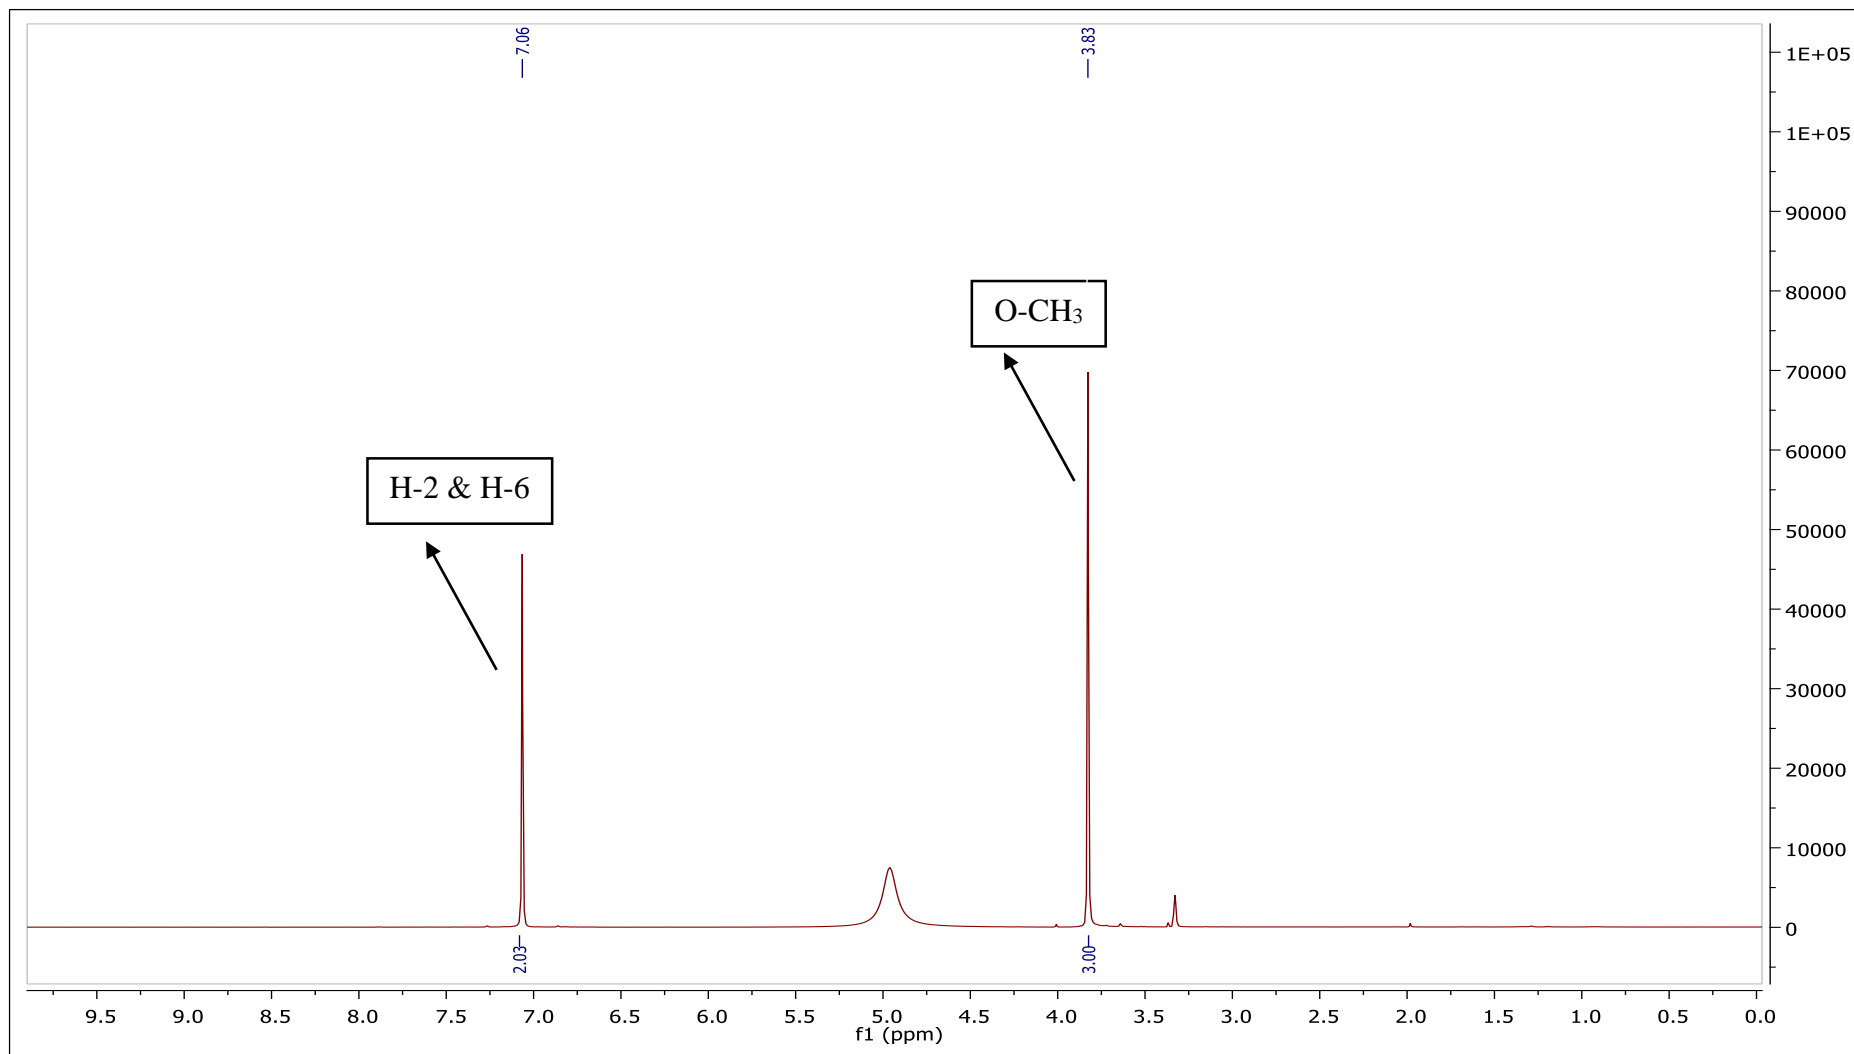

**Figure S9.**  $^1\text{H}$ -NMR (400 MHz,  $\text{CD}_3\text{OD}$   $\delta$  ppm) spectrum of compound **5**.

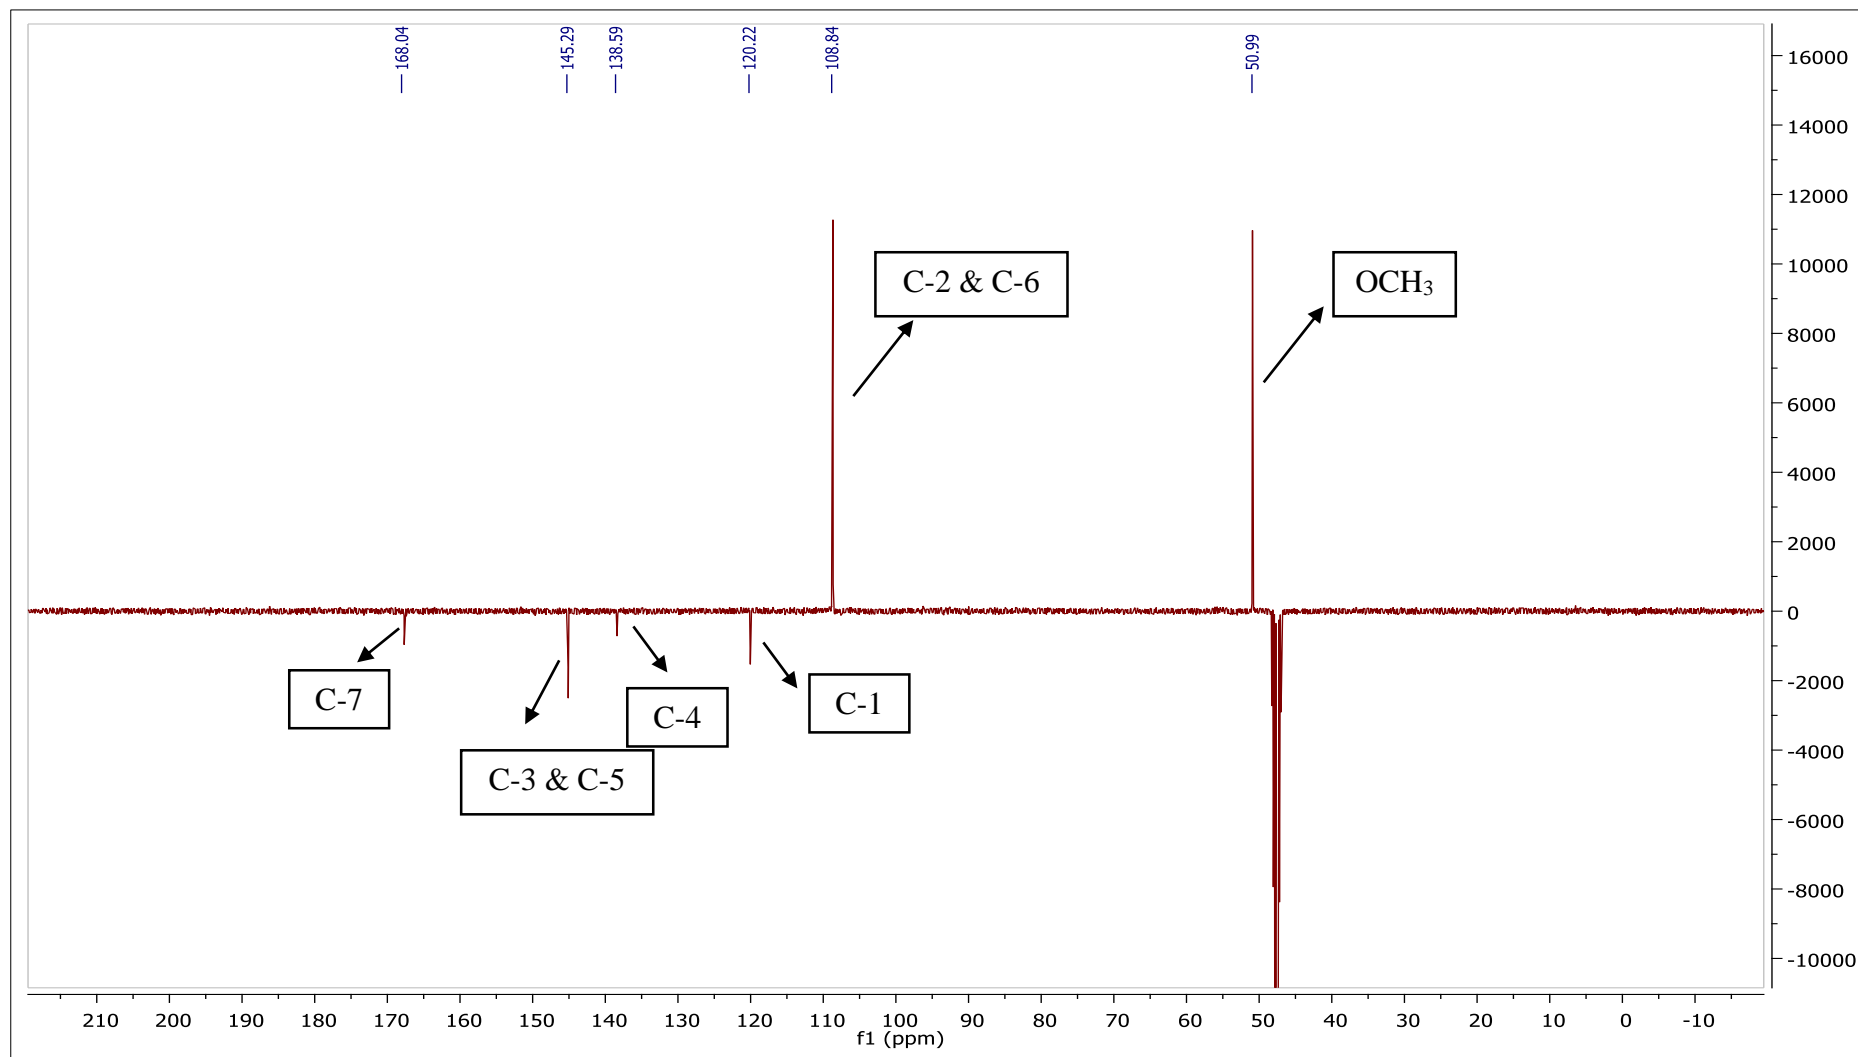

**Figure S10.** DEPT-Q NMR (100 MHz, CD<sub>3</sub>OD  $\delta$  ppm) spectrum of compound **5**.

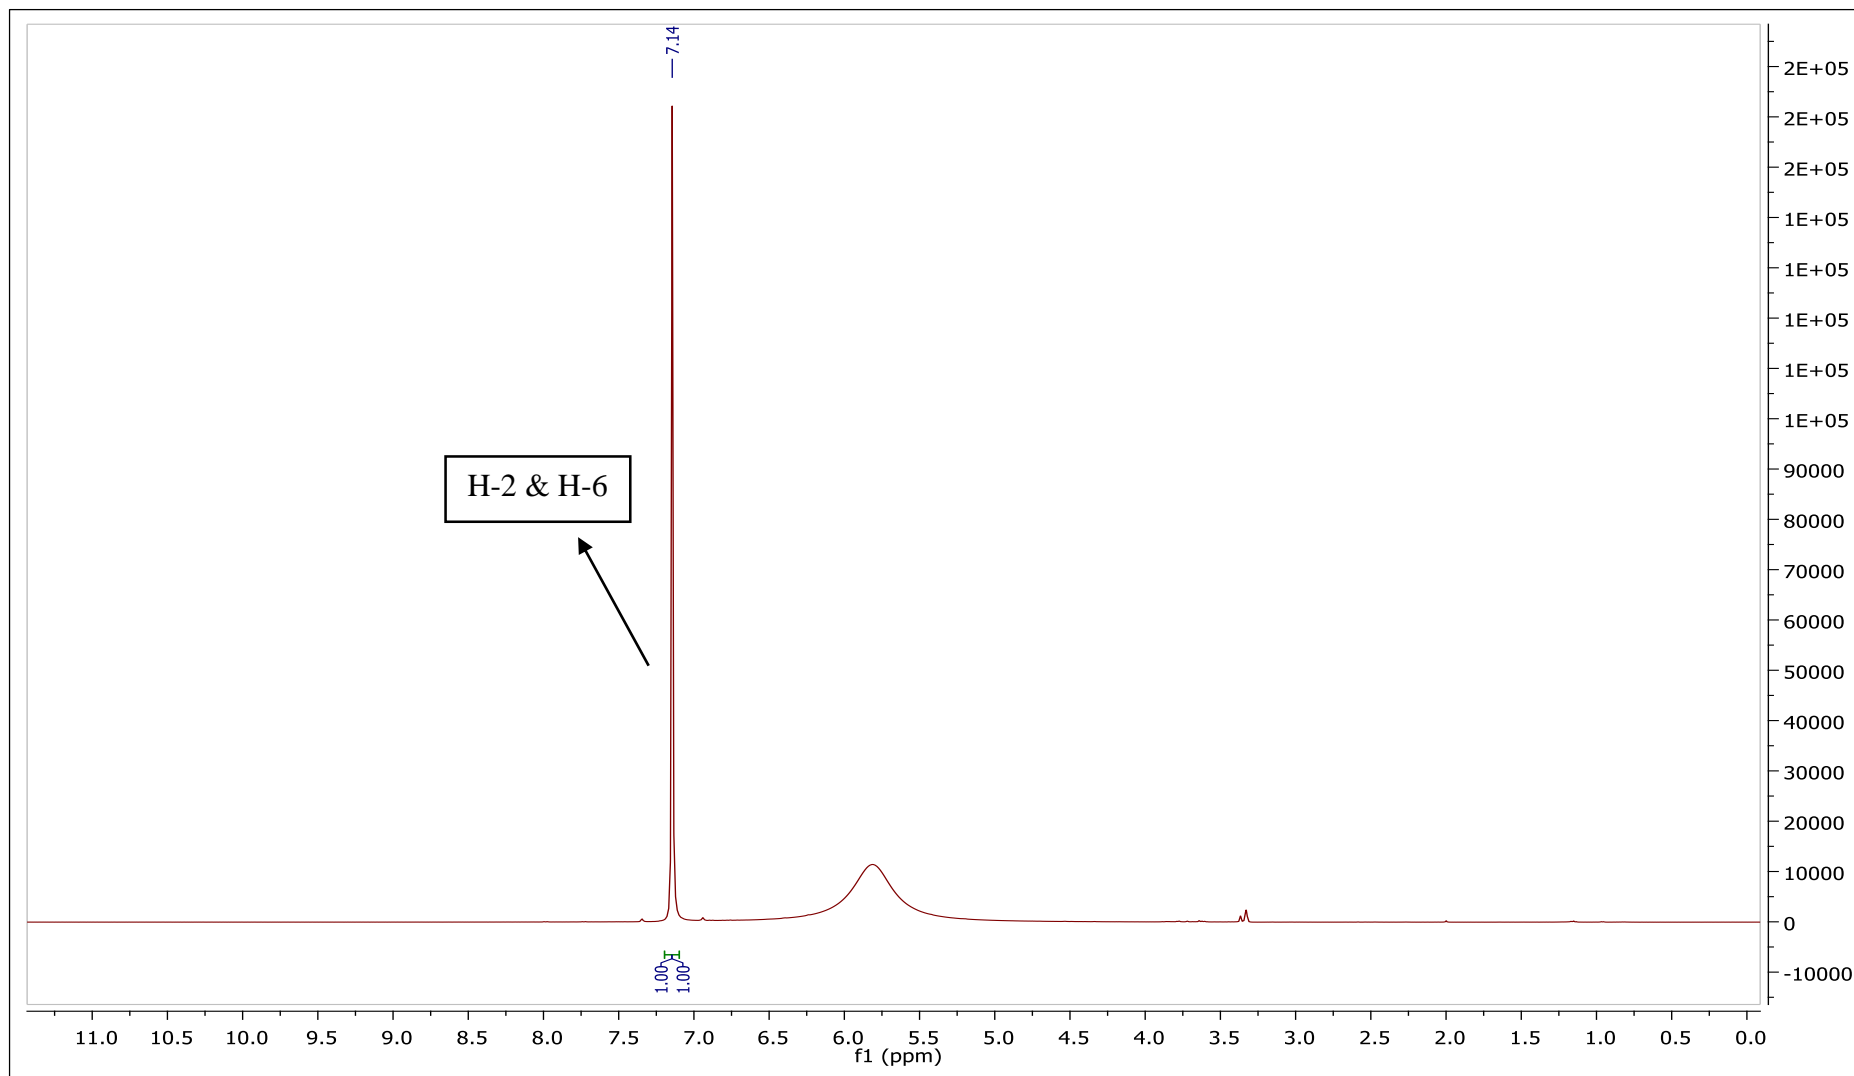

**Figure S11.**  $^1\text{H}$ -NMR (400 MHz,  $\text{CD}_3\text{OD}$   $\delta$  ppm) spectrum of compound **6**.

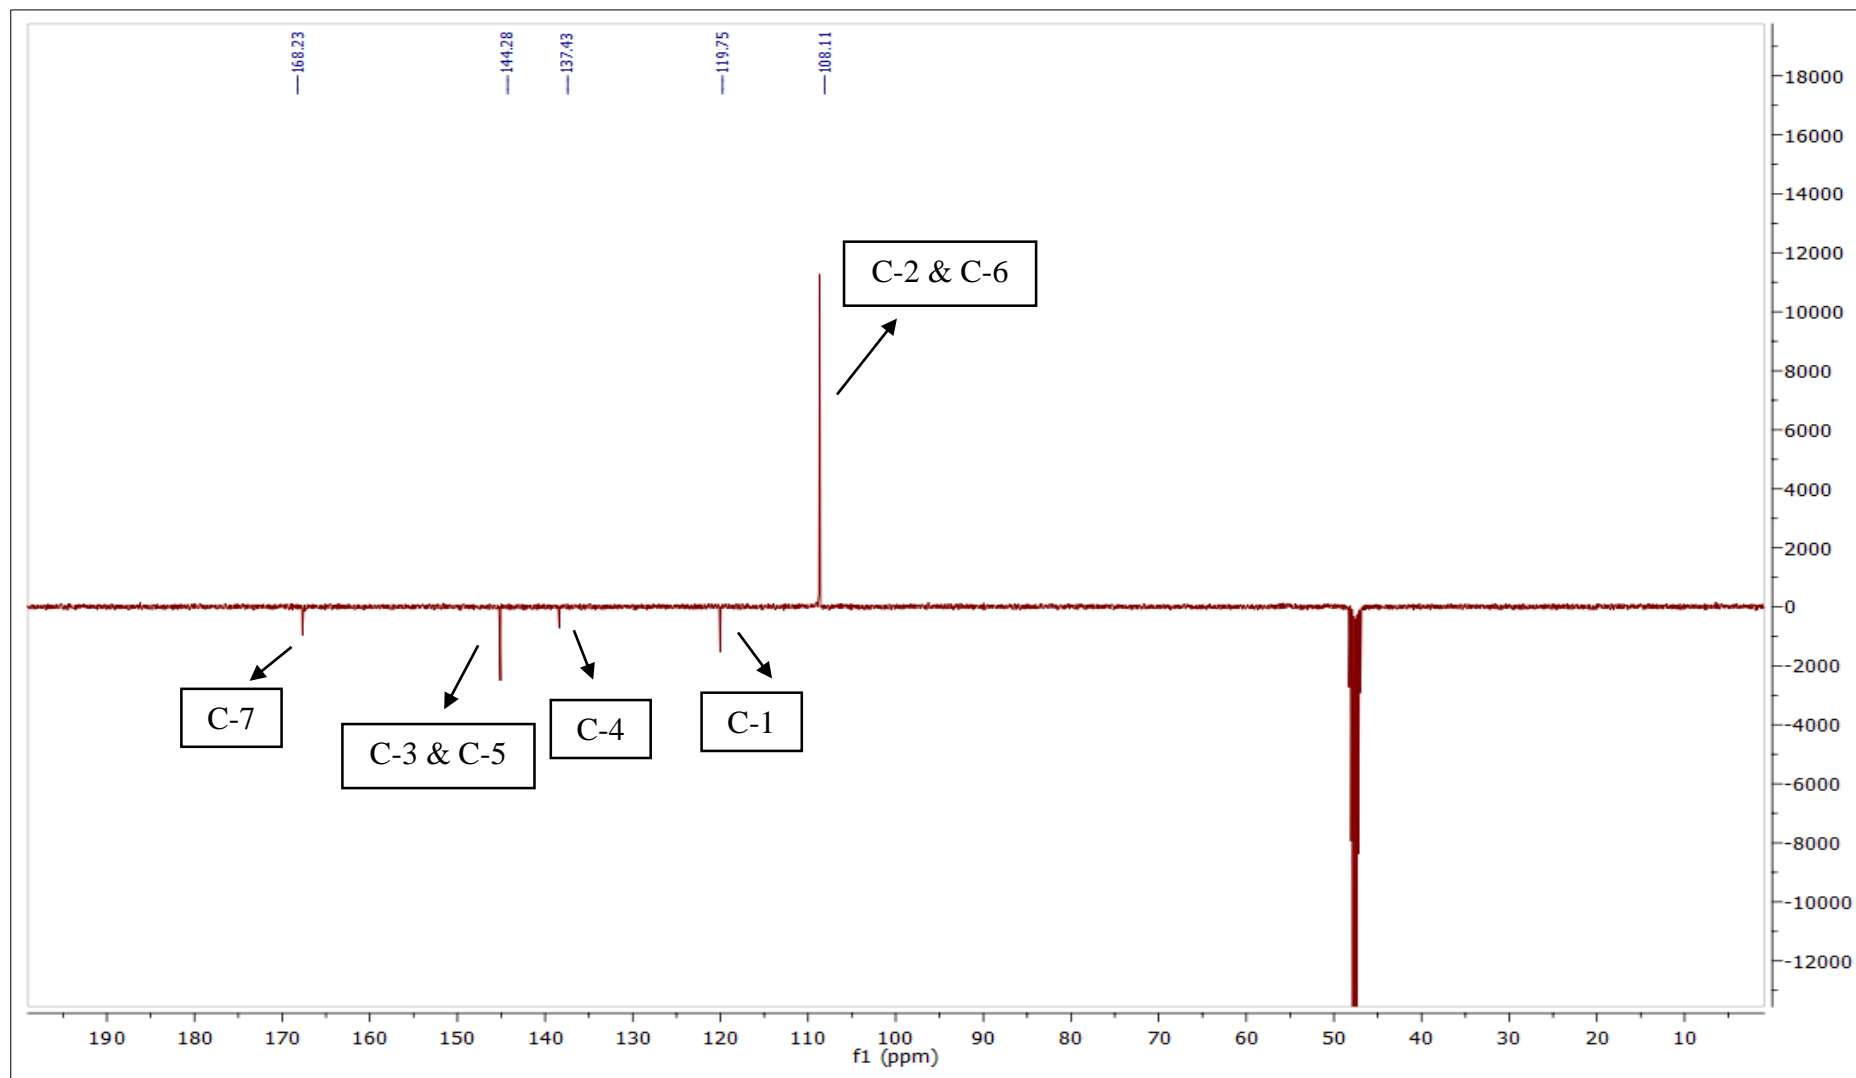

**Figure S12.** DEPT-Q NMR (100 MHz, CD<sub>3</sub>OD  $\delta$  ppm) spectrum of compound **6**.

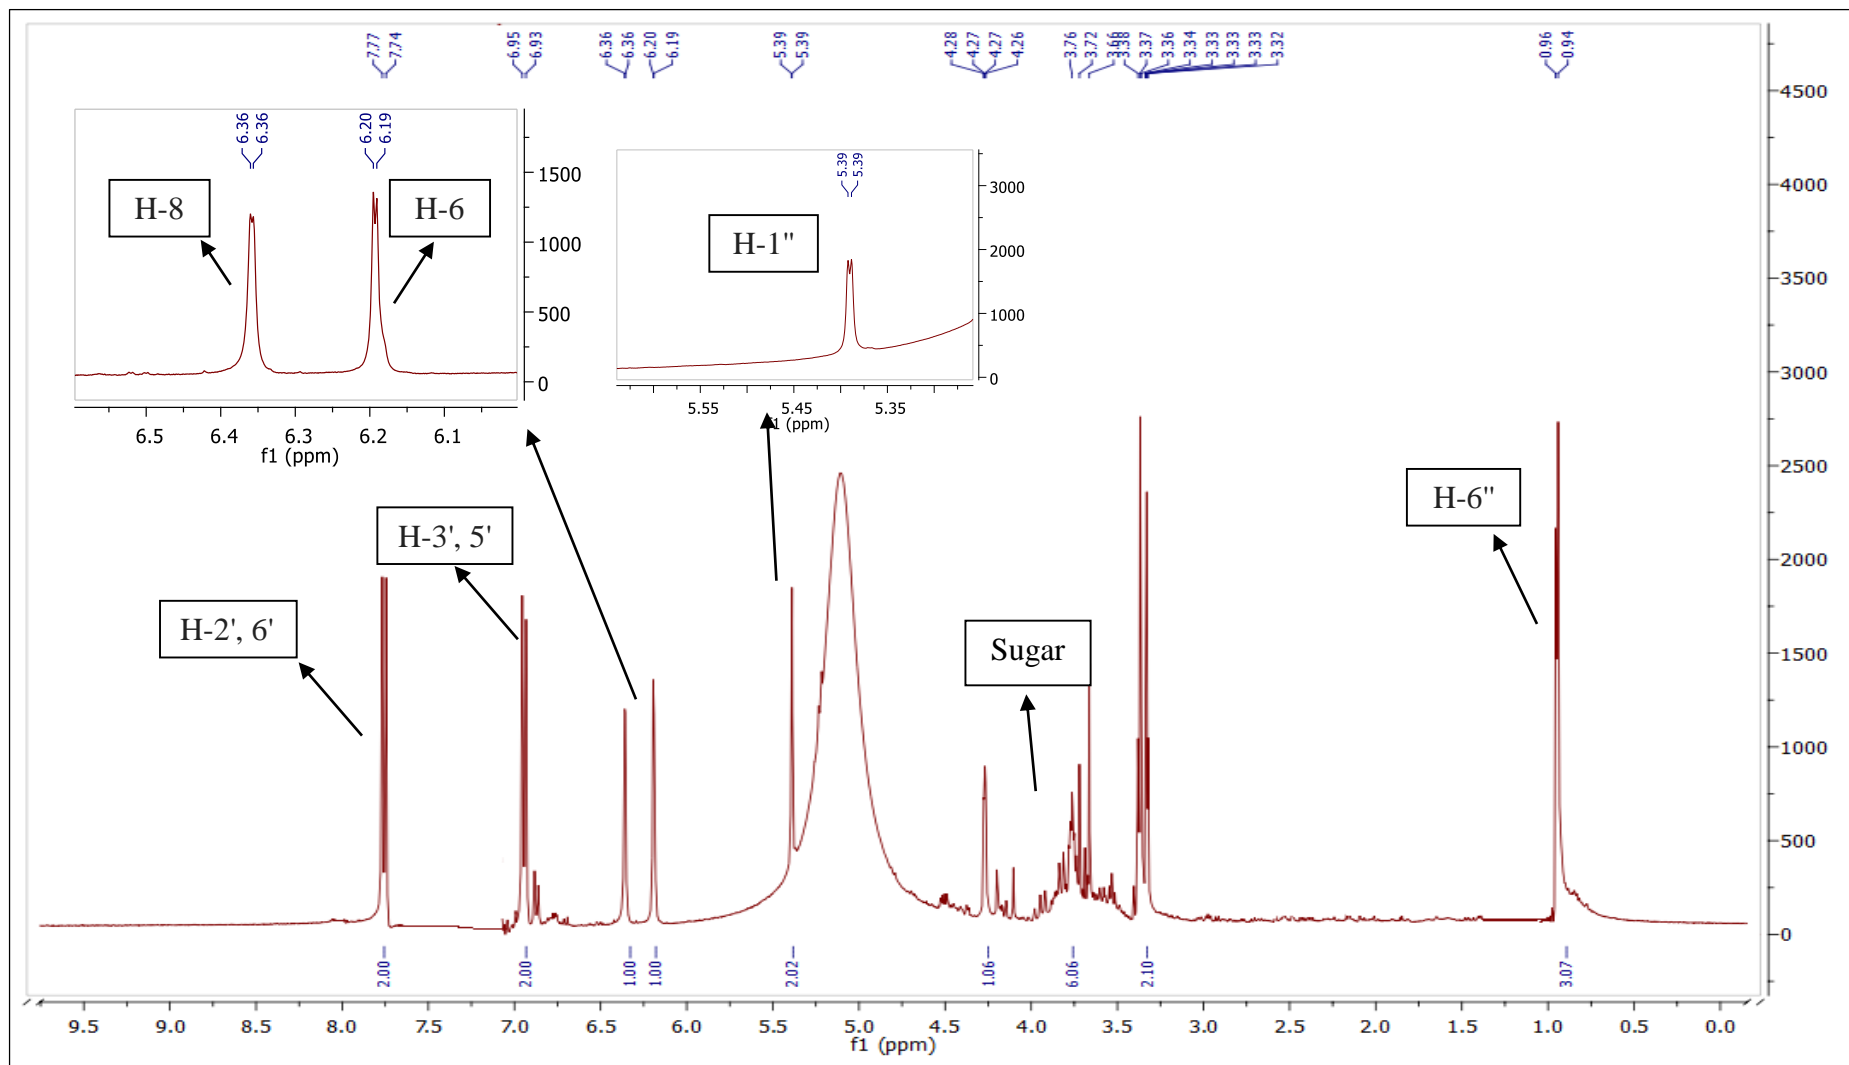

**Figure S13.**  $^1\text{H}$ -NMR (400 MHz,  $\text{CD}_3\text{OD}$   $\delta$  ppm) spectrum of compound 7.

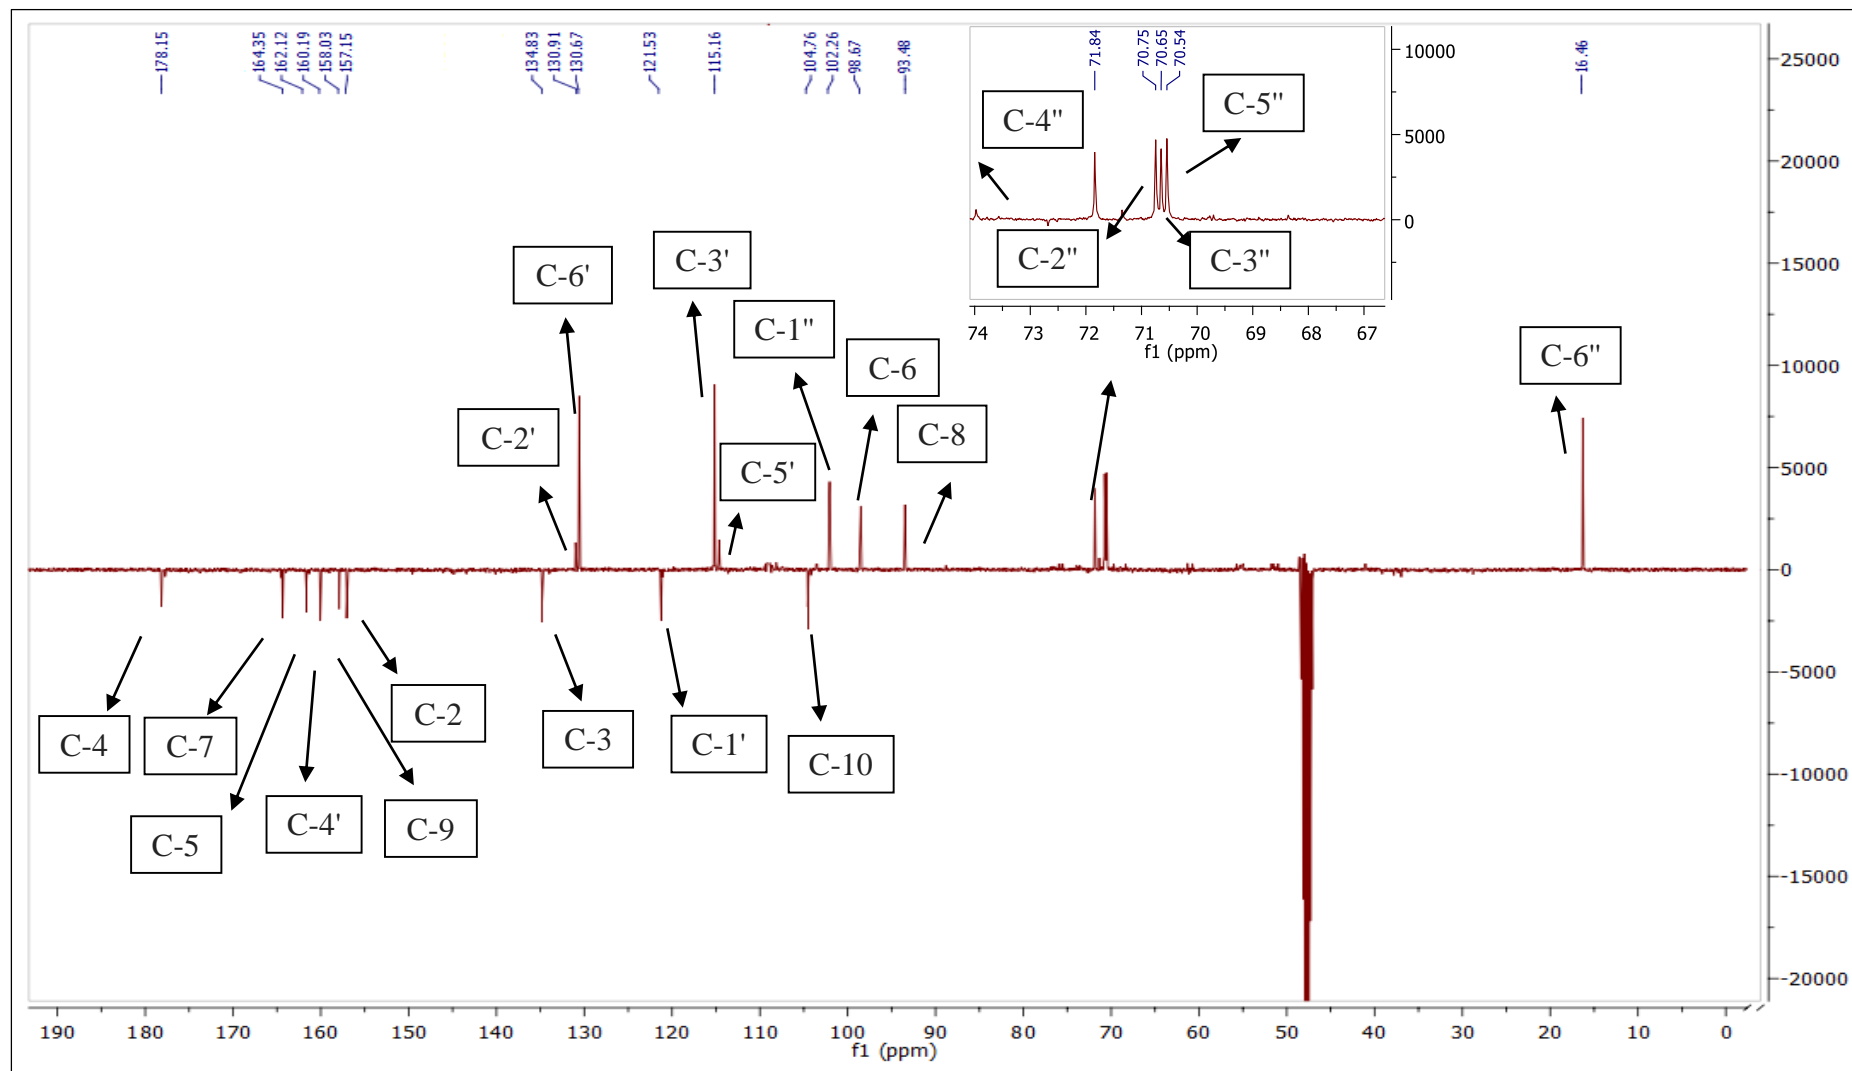

**Figure S14.** DEPT-Q NMR (100 MHz, CD<sub>3</sub>OD  $\delta$  ppm) spectrum of compound 7.

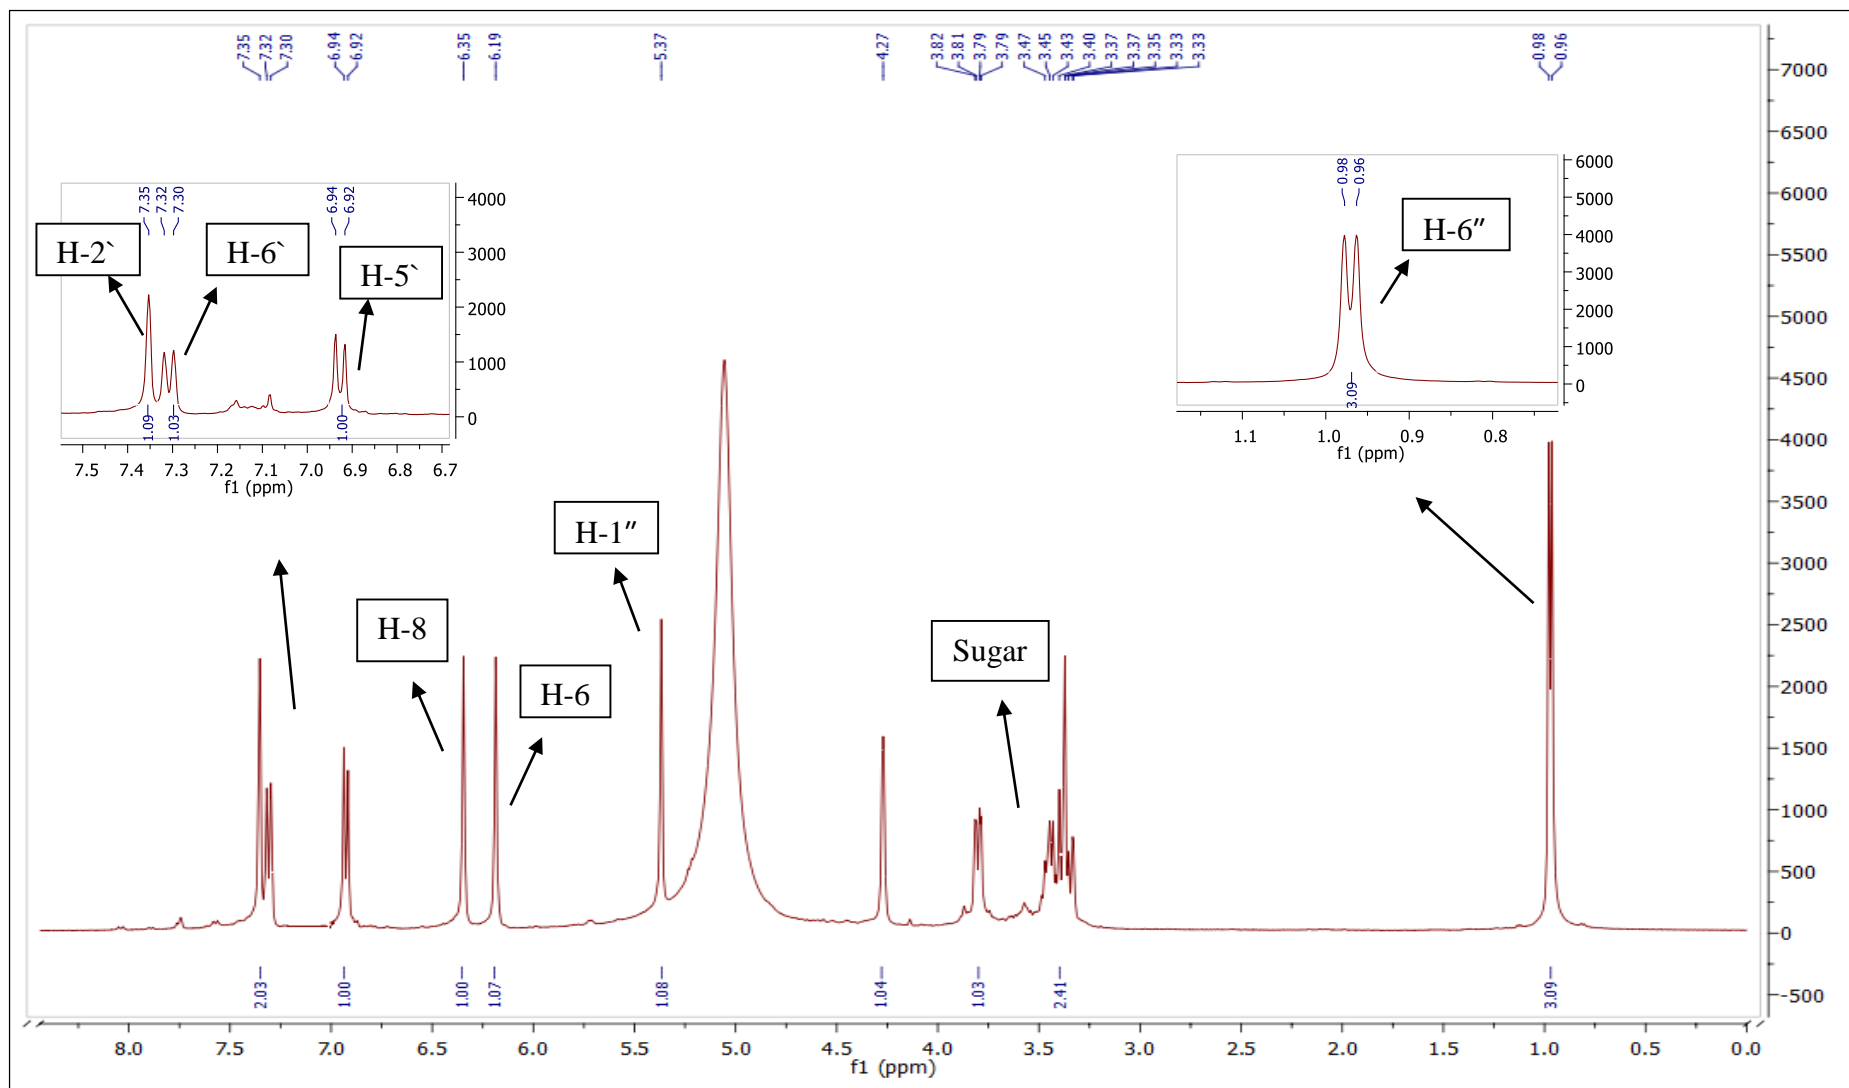

**Figure S15.**  $^1\text{H}$ -NMR (400 MHz,  $\text{CD}_3\text{OD}$   $\delta$  ppm) spectrum of compound **8**.

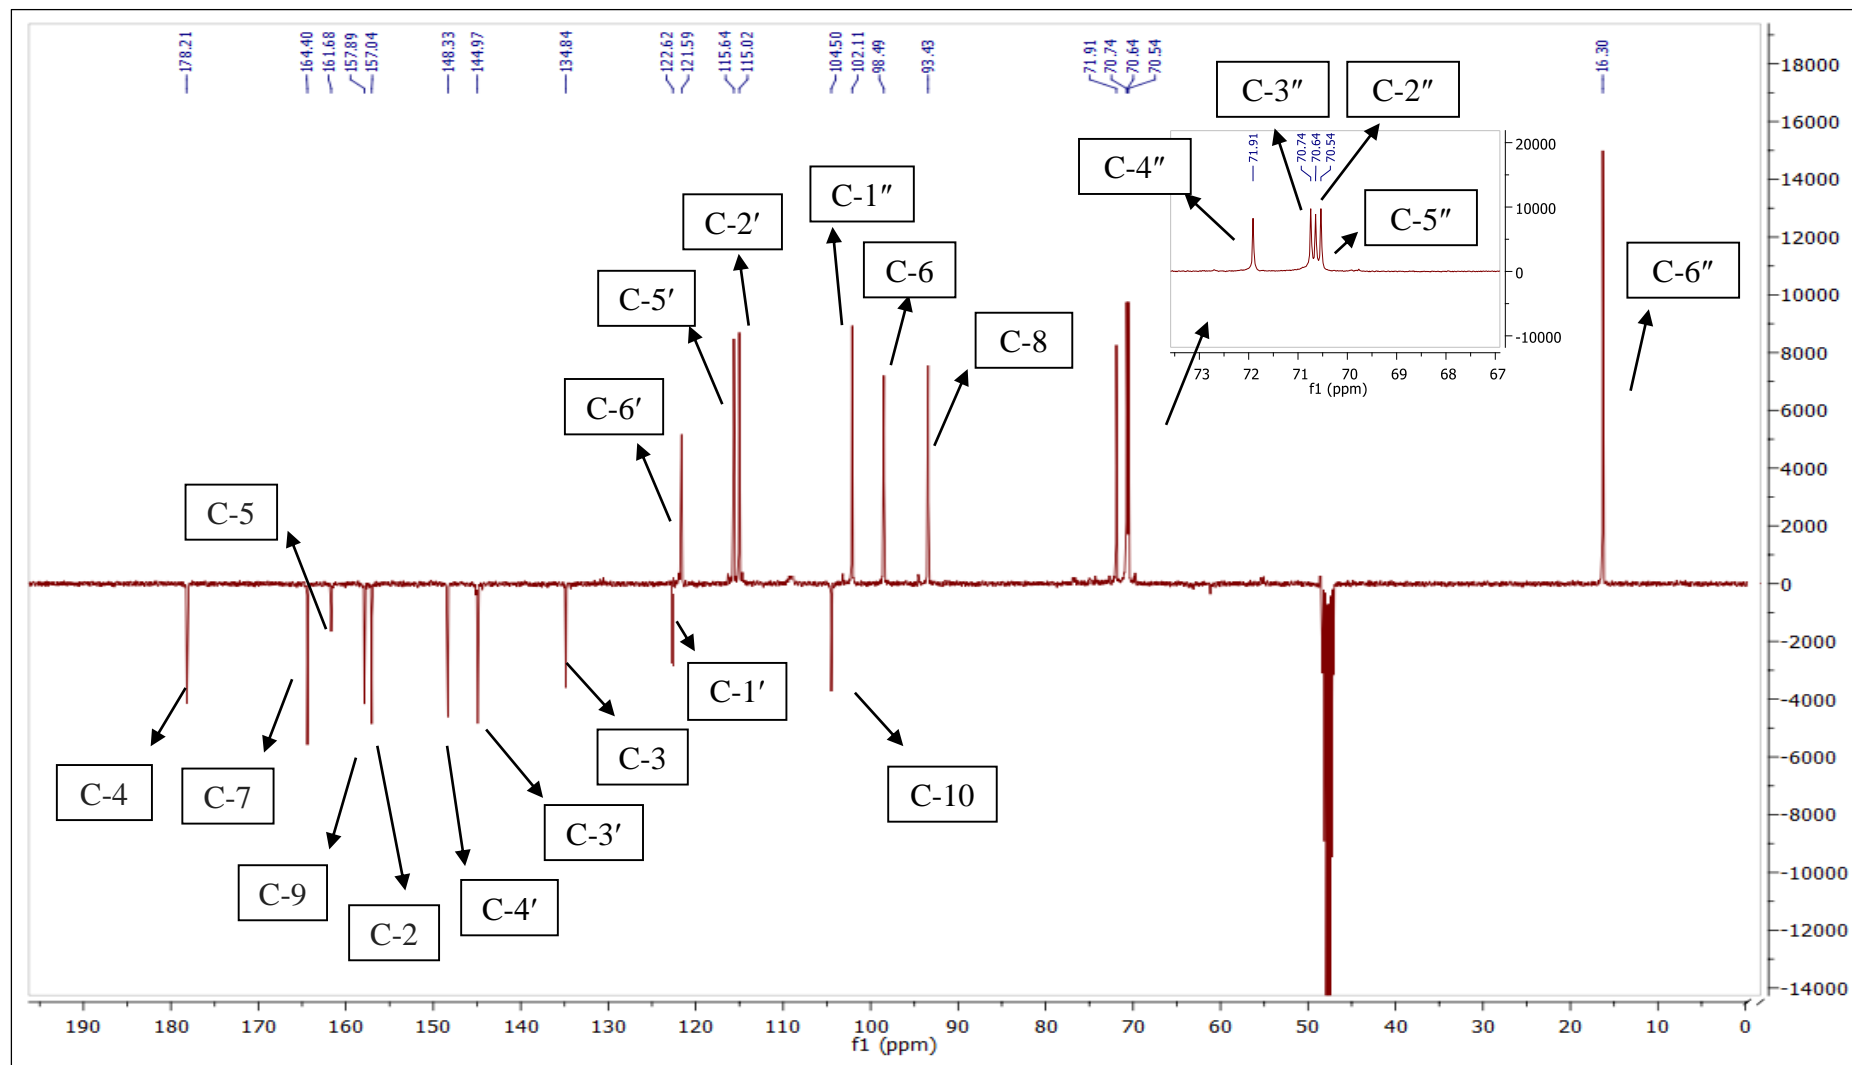

**Figure S16.** DEPT-Q NMR (100 MHz, CD<sub>3</sub>OD  $\delta$  ppm) spectrum of compound **8**.



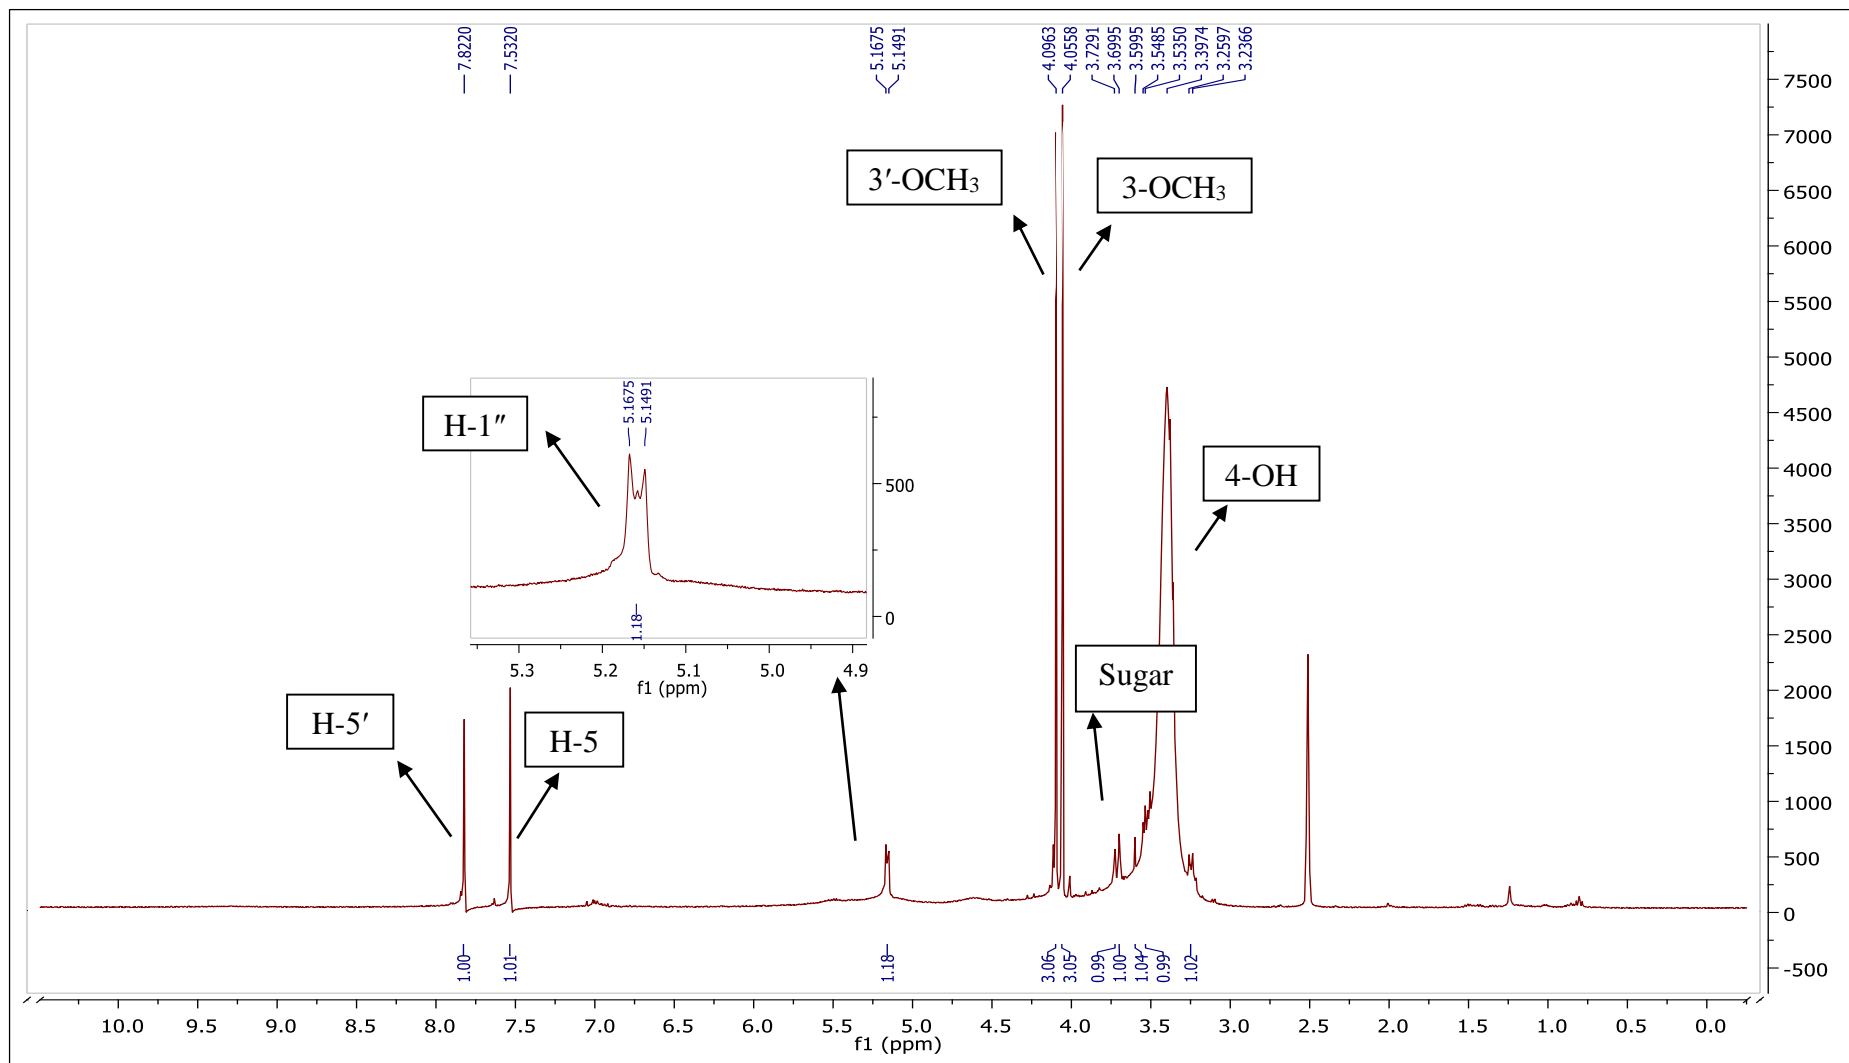

**Figure S17.** <sup>1</sup>H-NMR (400 MHz, DMSO-*d*<sub>6</sub> δ ppm) spectrum of compound **9**.

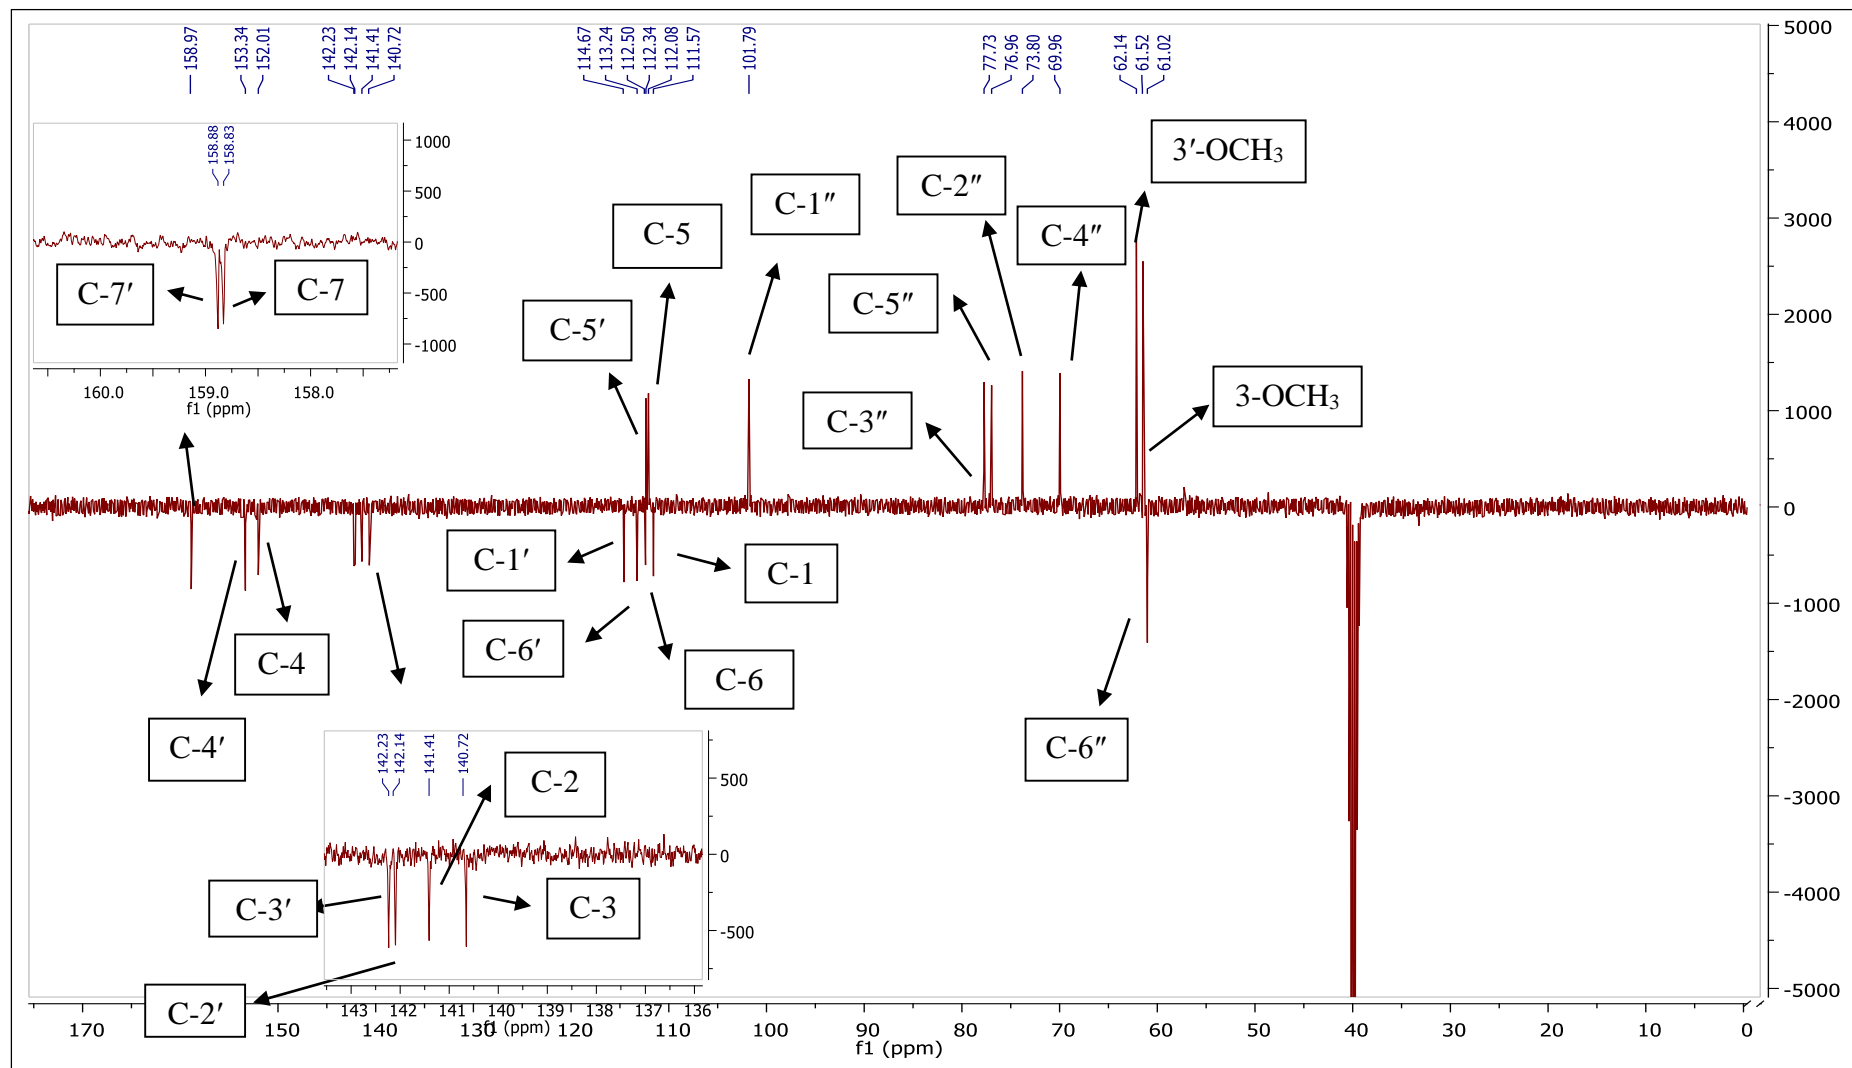

**Figure S18.** DEPT-Q NMR (100 MHz, DMSO-*d*<sub>6</sub> δ ppm) spectrum of compound **9**.

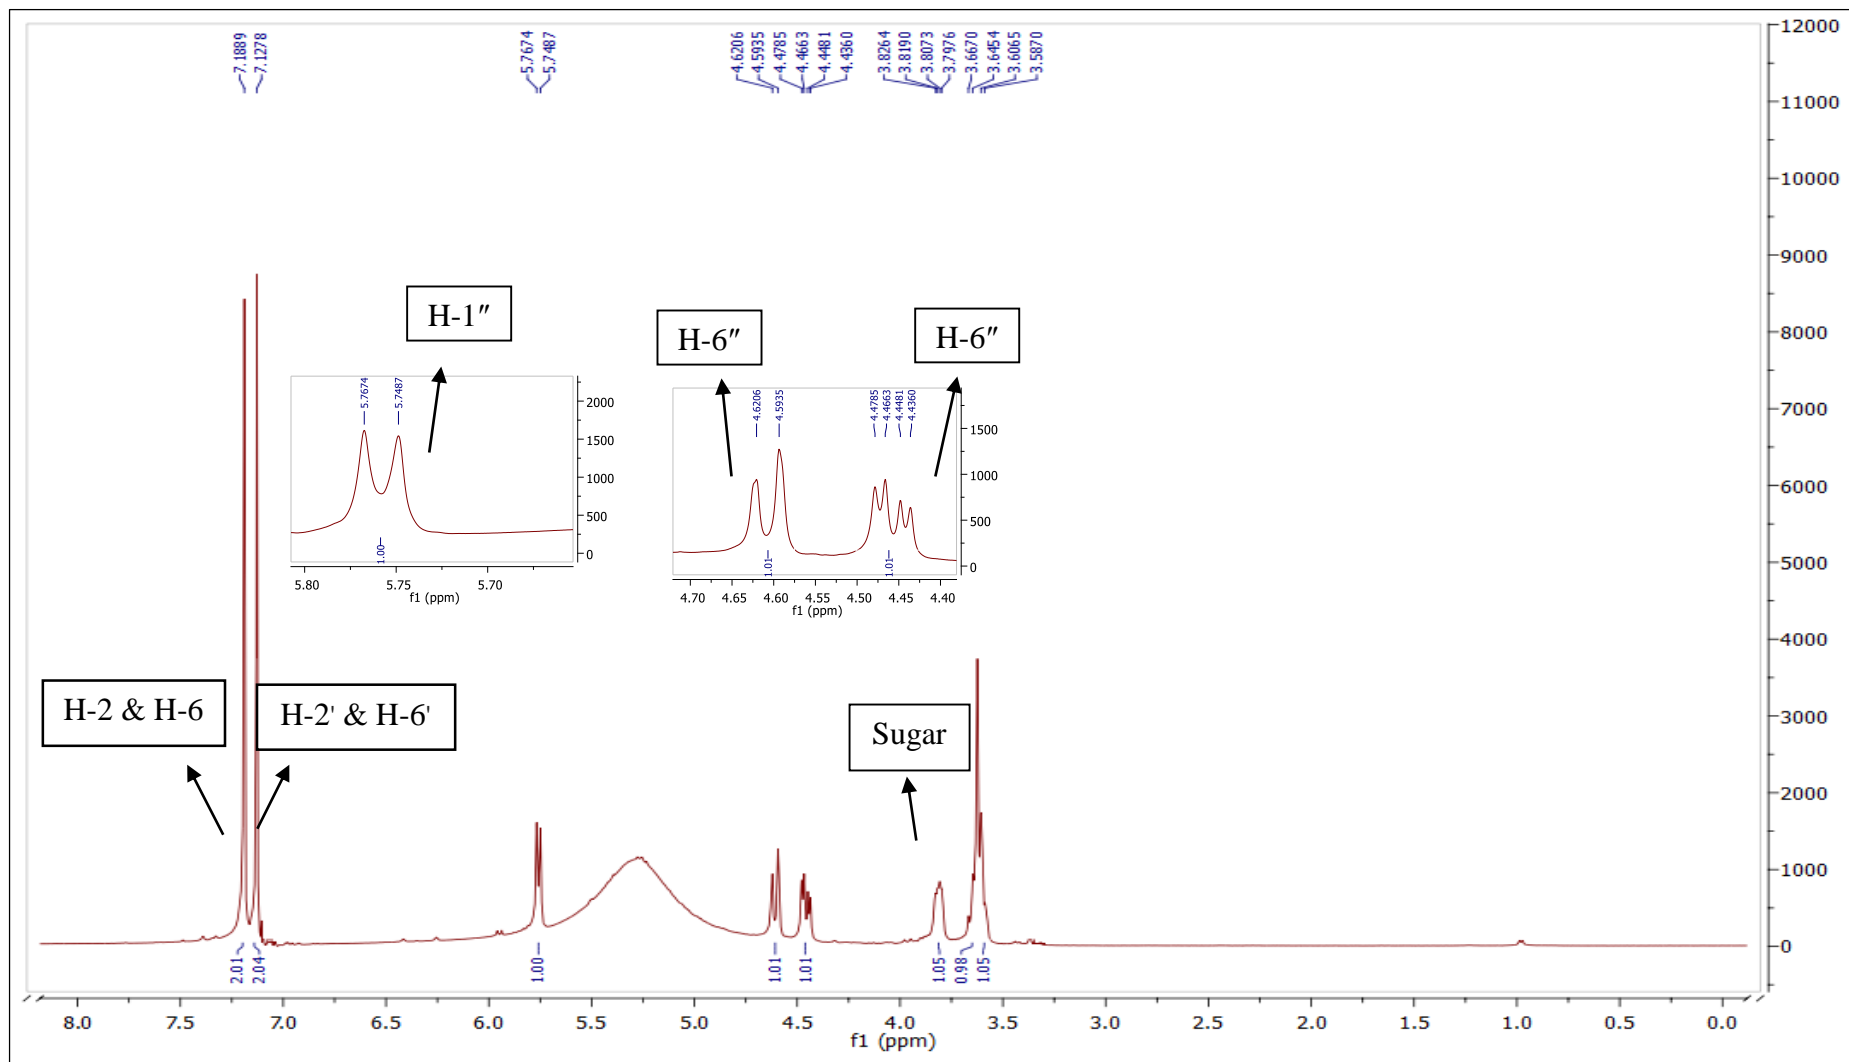

**Figure S19.**  $^1\text{H}$ -NMR (400 MHz,  $\text{CD}_3\text{OD}$   $\delta$  ppm) spectrum of compound **10**.

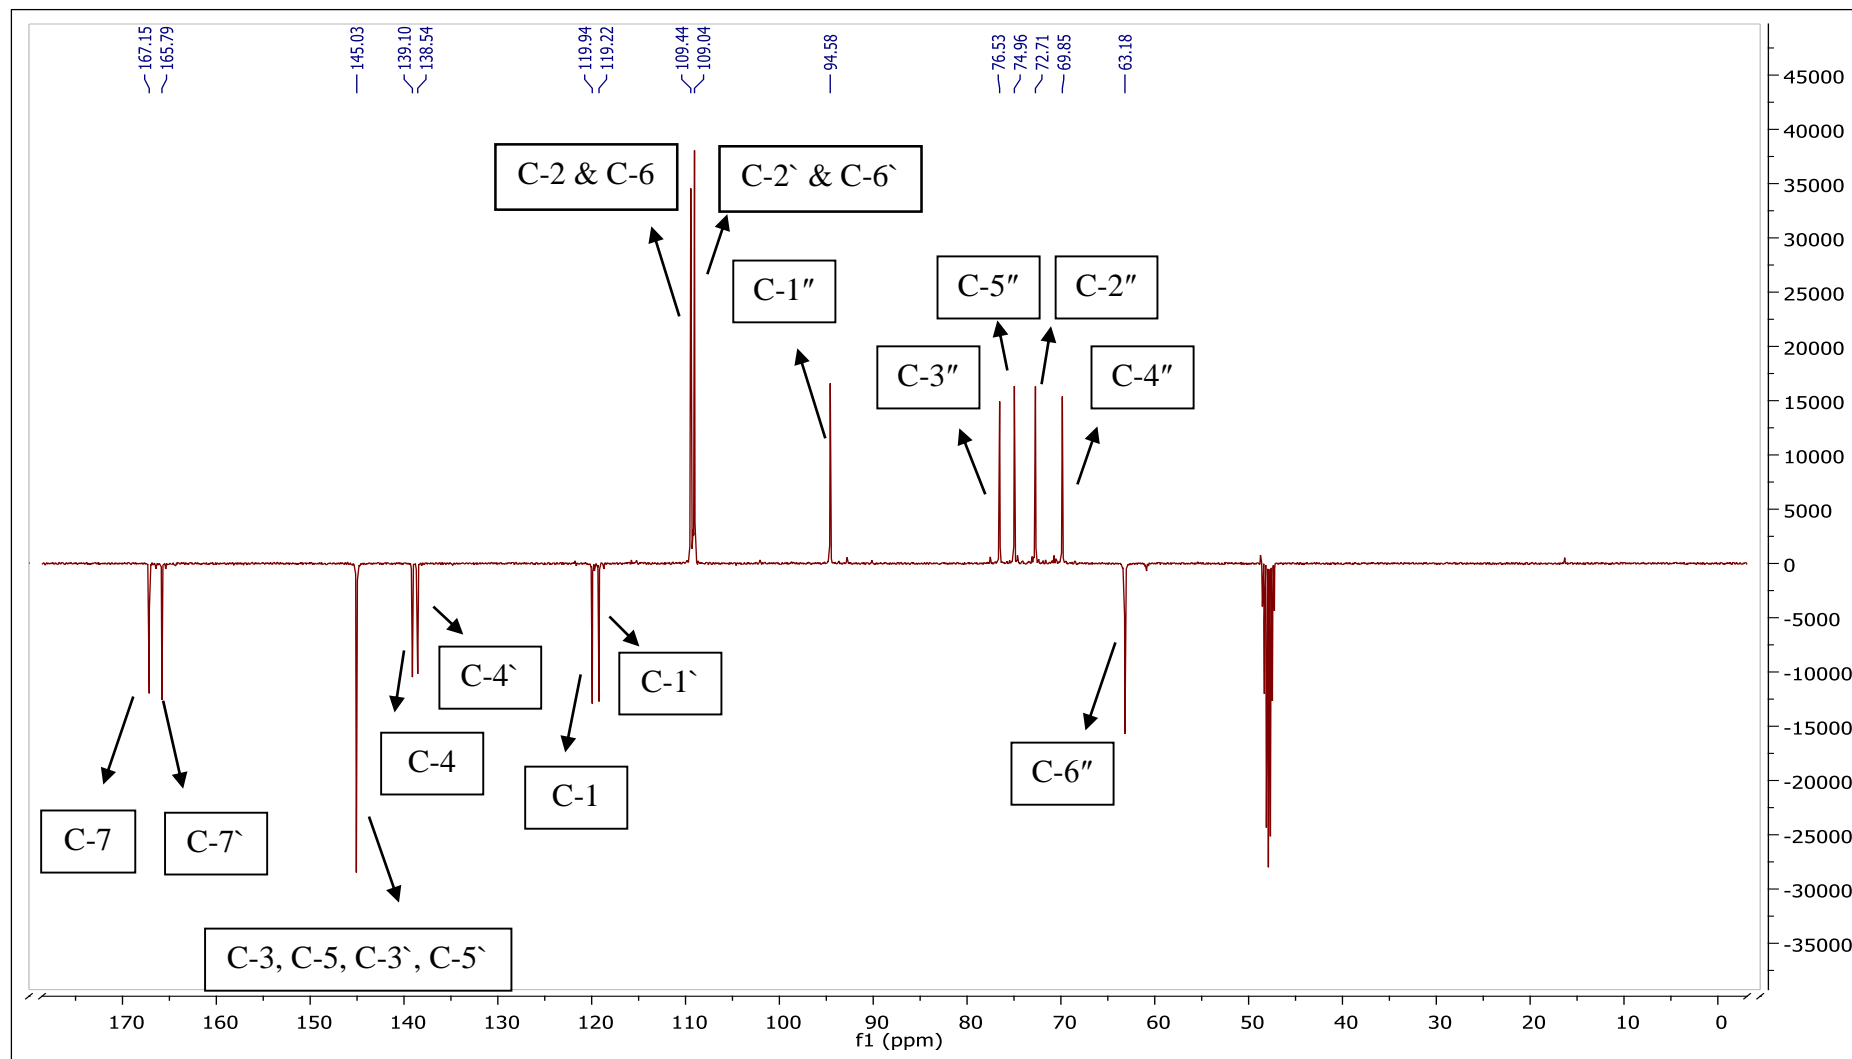

**Figure S20.** DEPT-Q NMR (100 MHz, CD<sub>3</sub>OD  $\delta$  ppm) spectrum of compound **10**.

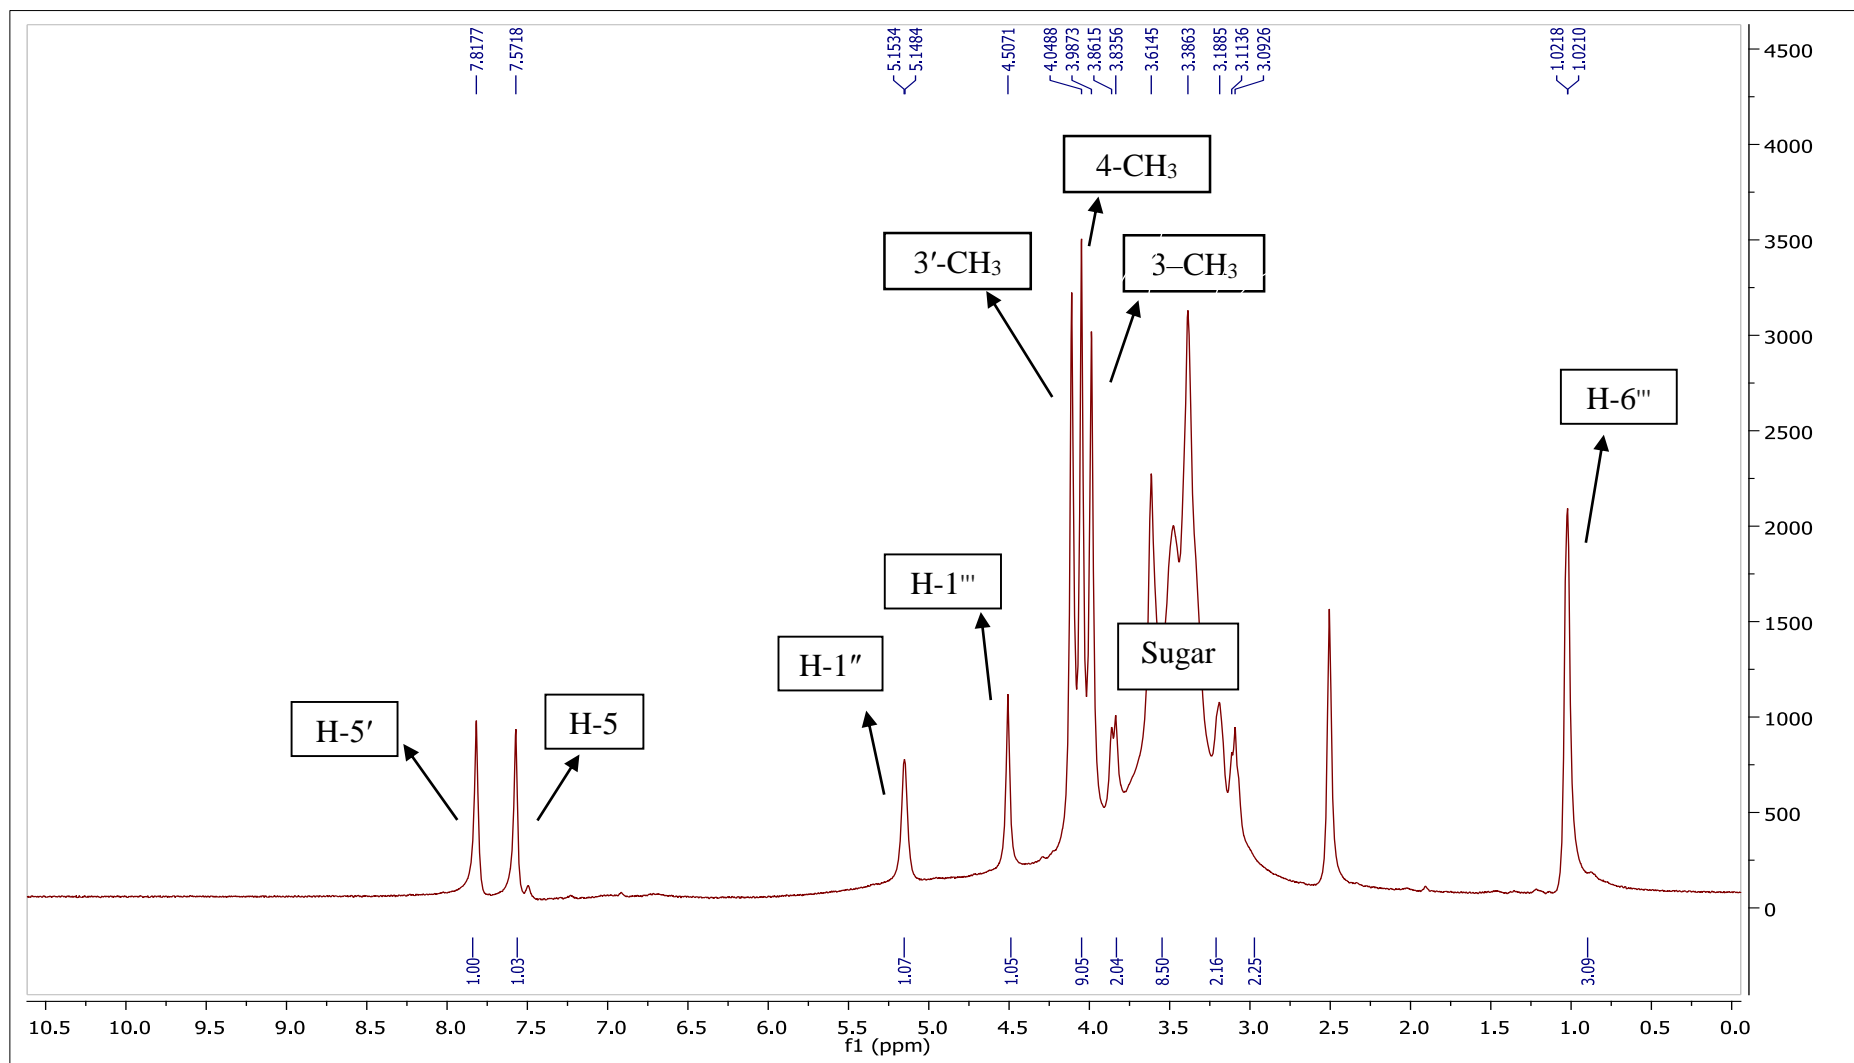

**Figure S21.** <sup>1</sup>H-NMR (400 MHz, DMSO-*d*<sub>6</sub> δ ppm) spectrum of compound **11**.

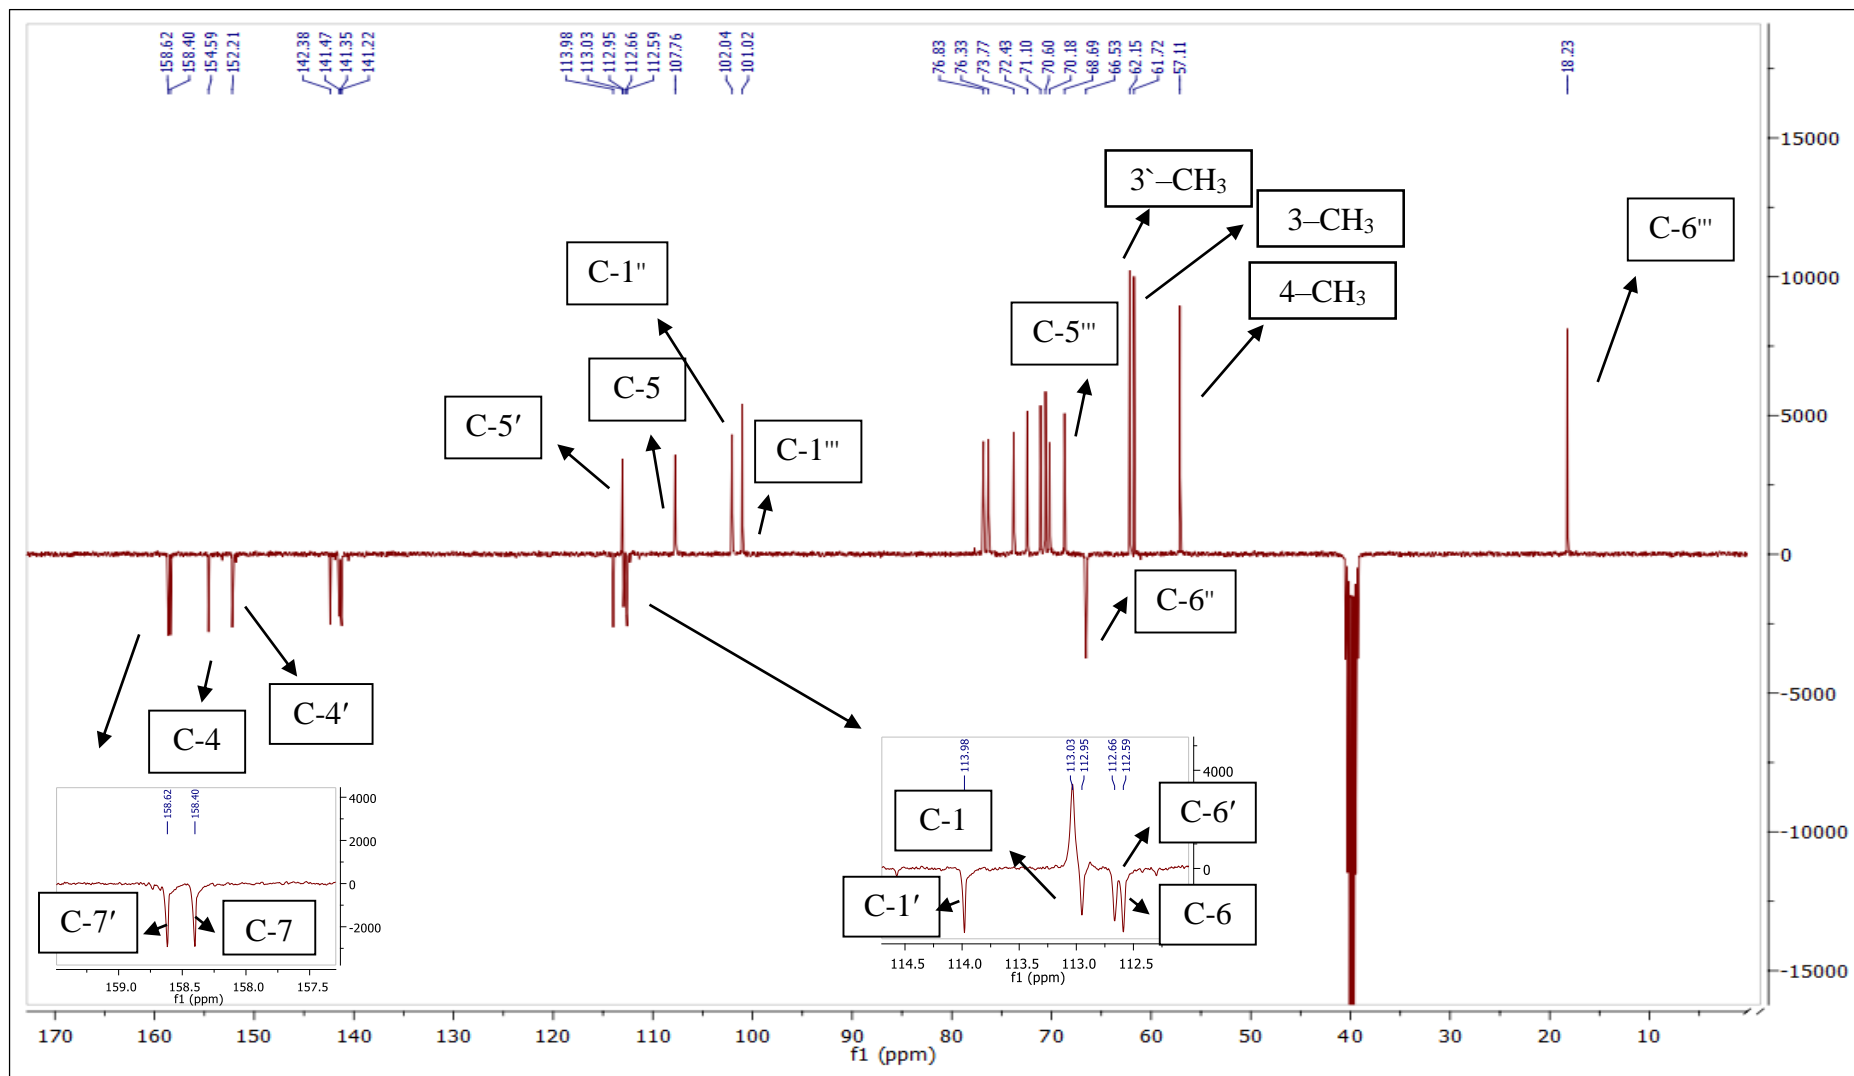

**Figure S22.** DEPT-Q NMR (100 MHz, DMSO- $d_6$   $\delta$  ppm) spectrum of compound **11**

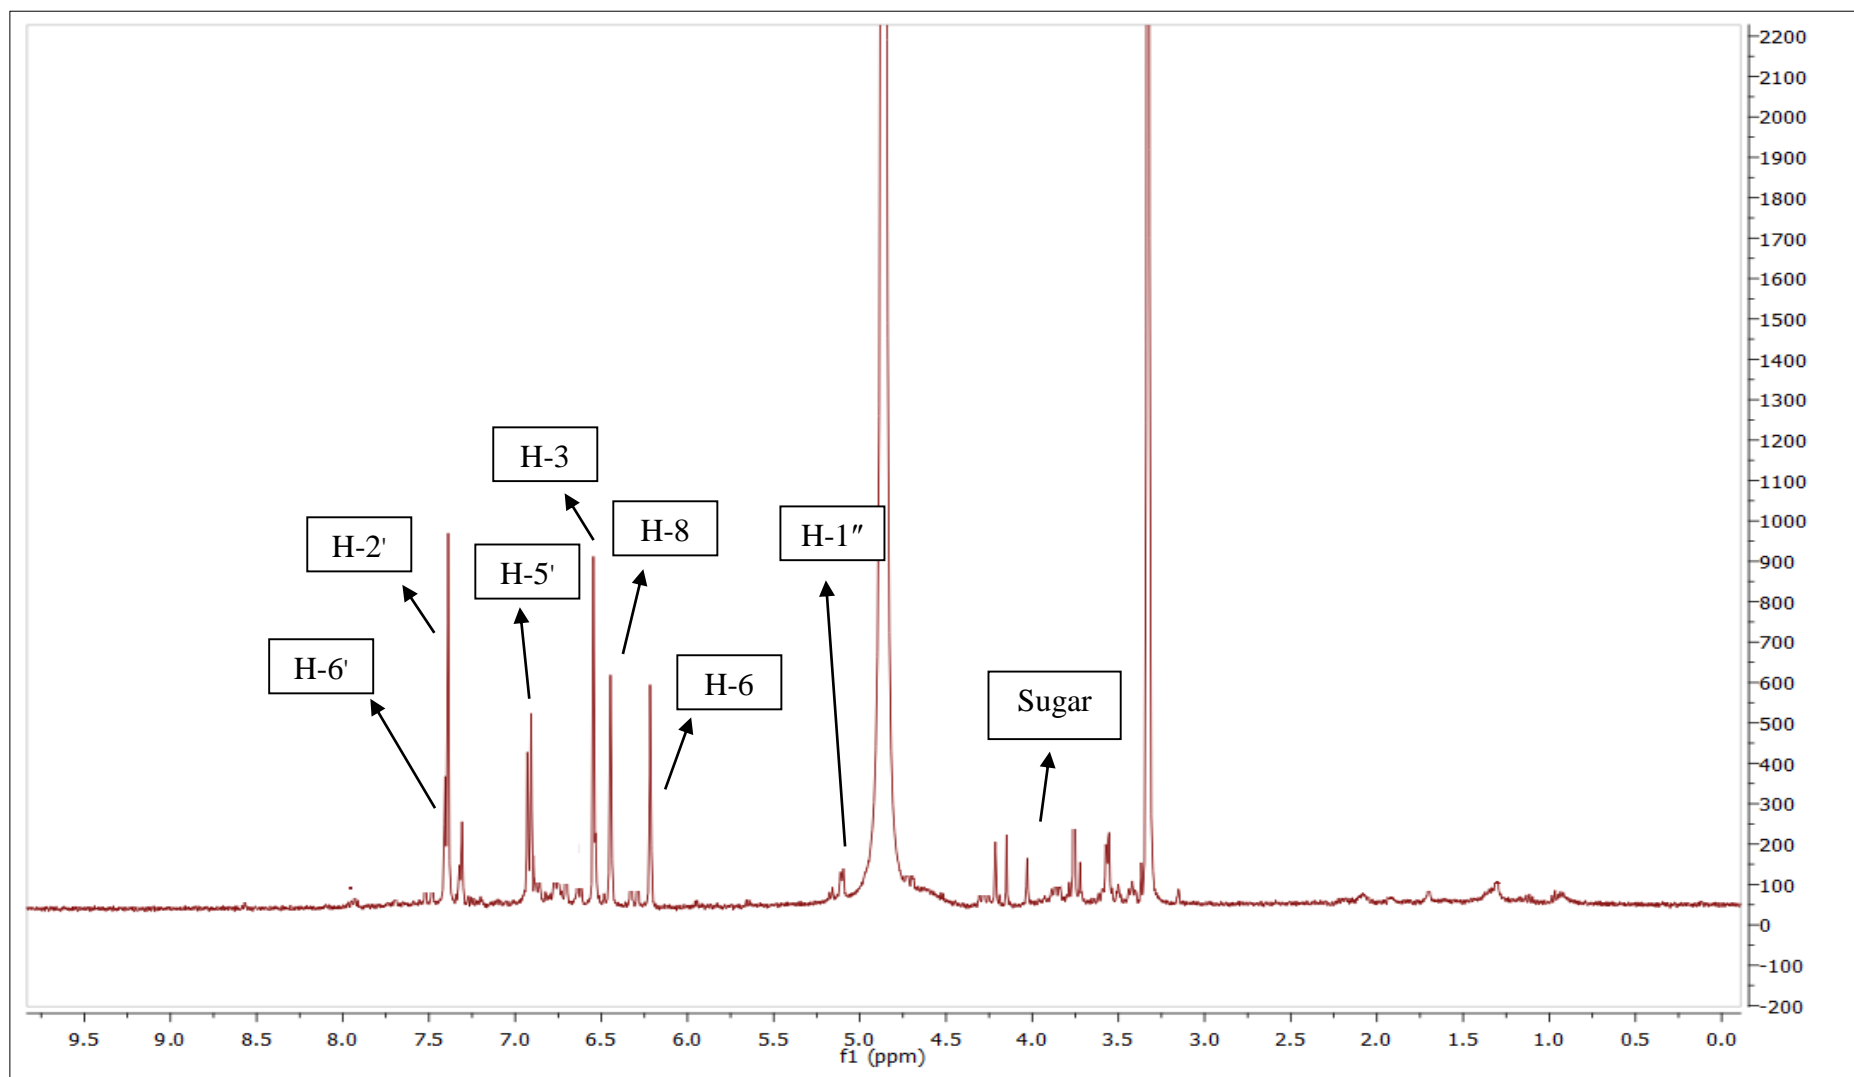

**Figure S23.**  $^1\text{H}$ -NMR (400 MHz,  $\text{CD}_3\text{OD}$   $\delta$  ppm) spectrum of compound **12**.

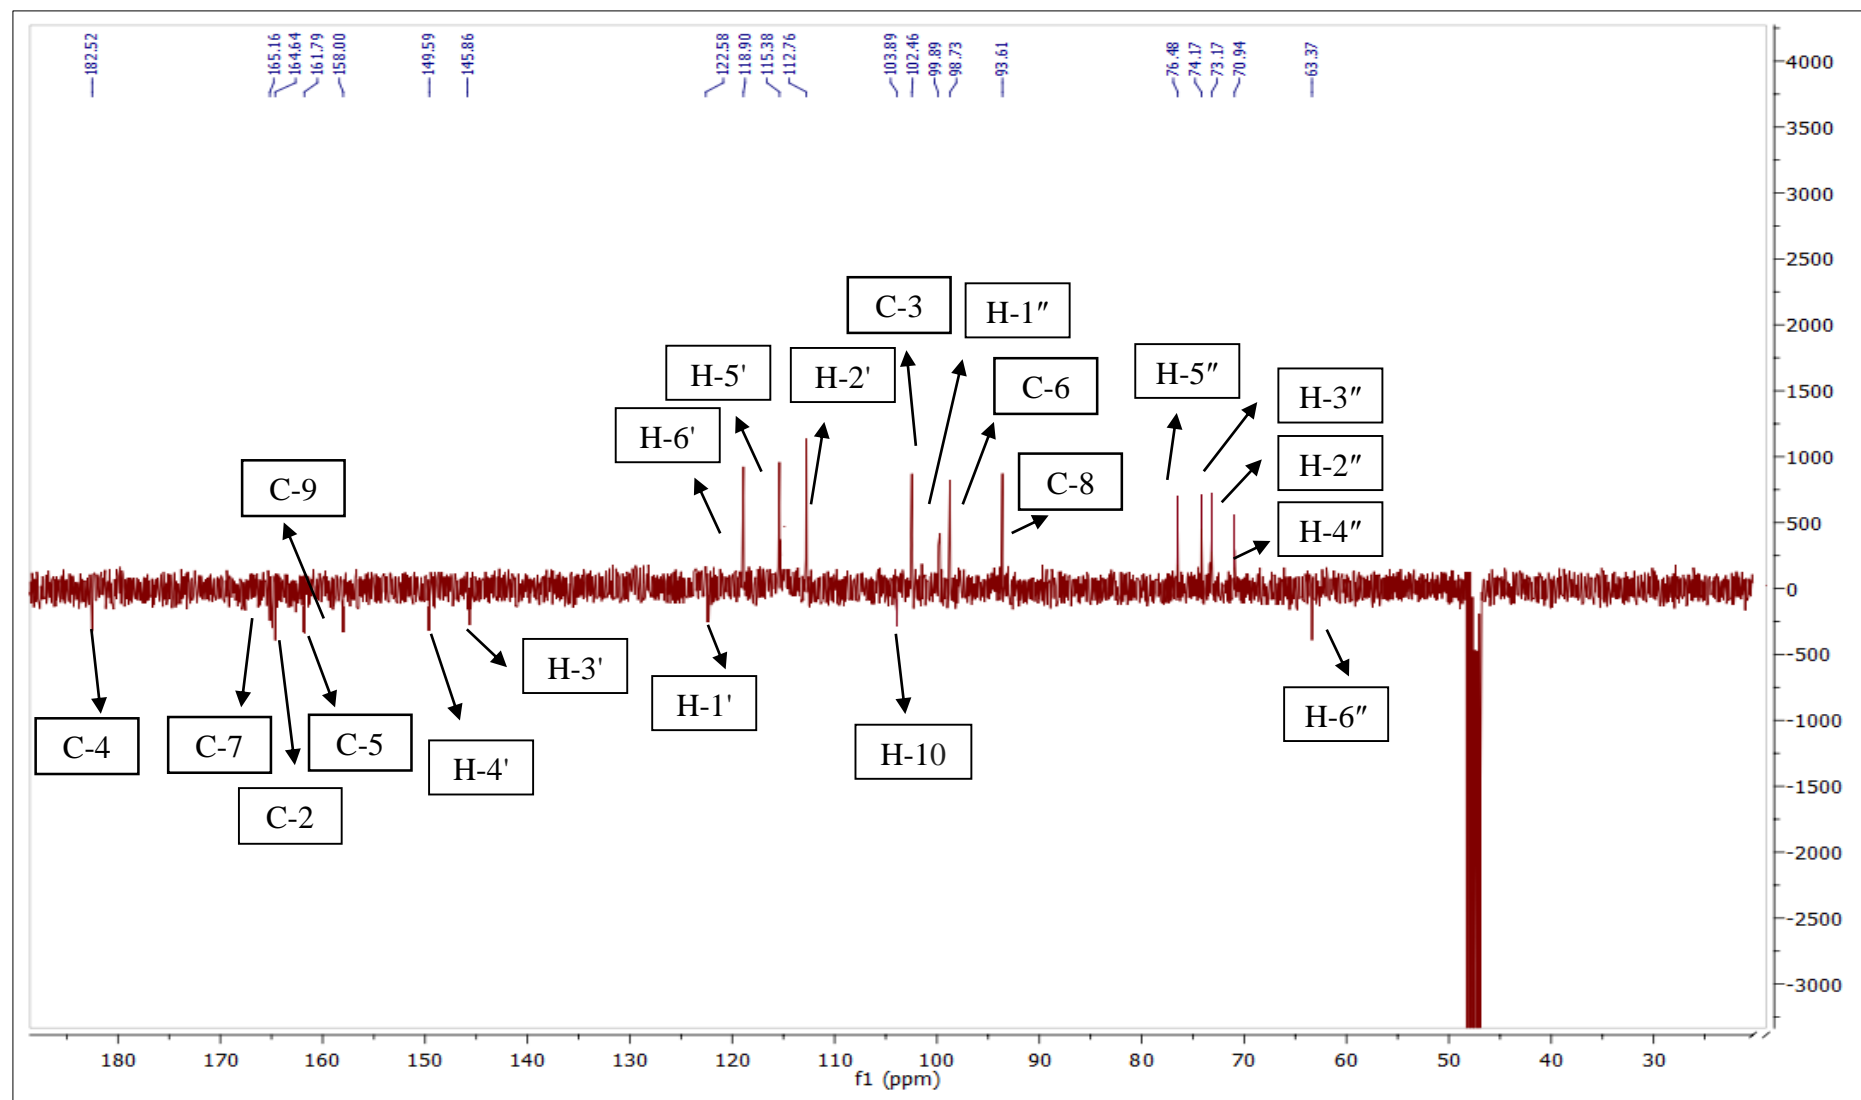

**Figure S24.** DEPT-Q NMR (100 MHz, CD<sub>3</sub>OD  $\delta$  ppm) spectrum of compound **12**.
